# Supplementary material
Source: ML conference proceedings conference paper supplement (https://openreview.net/forum?id=cjjPn1EIwq)
Supplement: supplementary_material [file ESCA_NeurIPS.pdf › ESCA-Material/ESCA_NeurIPS.pdf]

---

# ESCA: Contextualizing Embodied Agents via Scene-Graph Generation

---

Anonymous Author(s)

Affiliation

Address

email

## Abstract

Multi-modal large language models (MLLMs) are making rapid progress toward general-purpose embodied agents. However, current training pipelines primarily rely on high-level vision-sound-text pairs and lack fine-grained, structured alignment between pixel-level visual content and textual semantics. To overcome this challenge, we propose ESCA, a new framework for contextualizing embodied agents through structured spatial-temporal understanding. At its core is SGClip, a novel CLIP-based, open-domain, and promptable model for generating scene graphs. SGClip is trained on 87K+ open-domain videos via a neurosymbolic learning pipeline, which harnesses model-driven self-supervision from video-caption pairs and structured reasoning, thereby eliminating the need for human-labeled scene graph annotations. We demonstrate that SGClip supports both prompt-based inference and task-specific fine-tuning, excelling in scene graph generation and action localization benchmarks. ESCA with SGClip consistently improves both open-source and commercial MLLMs, achieving state-of-the-art performance across two embodied environments. Notably, it significantly reduces agent perception errors and enables open-source models to surpass proprietary baselines.

## 1 Introduction

Recent advances in large-scale pretraining have enabled foundation models to assist with a wide range of tasks, from language and vision understanding [2, 14, 47, 75] to mathematical problem solving [17, 88] and code generation [20, 50, 56]. However, it remains an open challenge to realize embodied agents that are capable of doing household chores, training alongside humans in physical activities, or providing care for the aging [12, 36]. A critical first step toward this goal is equipping agents with fine-grained perception to ground abstract goals in physical interactions.

Despite progress, multi-modal large language models (MLLMs) still struggle to build spatially and temporally grounded world models. Their inability to reliably ground visual features with spatial-temporal relations creates a disconnect between conceptual semantics and pixel-level observations [55, 81]. This lack of structured, fine-grained scene understanding severely limits their effectiveness in embodied environments. In fact, our empirical analysis shows that up to 69% of agent failures stem from perception errors, highlighting the need for frameworks that can bridge this gap.

To address this challenge, we propose integrating structured scene graphs into the perception, reasoning, and planning pipelines of MLLM-based embodied agents. While prior work has explored enhancing MLLMs with external visual grounding modules, these approaches typically rely on open-domain object detection models such as Grounding DINO [51] and YOLO [26]. However, these models are primarily designed for object identification and often overlook semantic attributes, inter-object relationships, and temporal consistency.

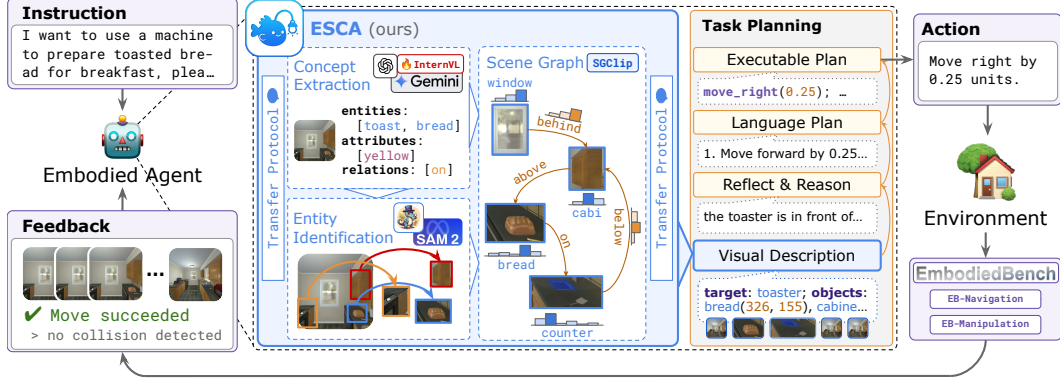

Figure 1: An overview of embodied agent pipeline augmented with ESCA. In each cycle, the agent takes in an instruction and the environmental feedback and outputs a concrete executable action, through a sequence of perception, reasoning, and planning. The action is then executed and the environment will provide the next state. Notably, ESCA contextualizes the task planner with grounded visual features represented as a scene graph.

In this work, we introduce **ESCA (Embodied and Scene-Graph Contextualized Agent)**, a framework designed to contextualize MLLMs through open-domain scene graph generation (Figure 1). Much like the bioluminescent lure of a deep-sea anglerfish, which illuminates its surroundings to reveal otherwise hidden prey, ESCA provides structured visual grounding, helping MLLMs make sense of complex and ambiguous sensory environments. ESCA operates as a multi-stage pipeline, generating task-aware scene graphs that reflect both visual content and human instructions. At its core is SGClip, a CLIP-based model that captures semantic visual features, including entity classes, physical attributes, actions, interactions, and inter-object relations. SGClip is trained through a model-driven, self-supervised learning pipeline, allowing it to generalize across diverse embodied environments.

Through experiments on two challenging embodied environments, we demonstrate that ESCA consistently improves the performance of all evaluated MLLMs, including both open-source and proprietary models. By providing structured and grounded scene graphs, ESCA significantly reduces perception errors, laying the foundation for more reliable reasoning and planning. Beyond its integration with MLLM-based agents, we show that SGClip, when evaluated independently, exhibits strong zero-shot generalization, is promptable for task-specific scene understanding, and remains fine-tunable for downstream tasks such as action recognition.

In summary, our contributions are as follows: (1) we present ESCA, a general framework for contextualizing MLLM-based embodied agents through scene graph generation; (2) we introduce SGClip, a generalizable and fine-grained scene graph generation model, along with ESCA-Video-87K, an MLLM annotated dataset; (3) we propose a transfer protocol for adapting ESCA to diverse embodied benchmarks; and (4) we conduct extensive evaluations demonstrating the effectiveness and versatility of ESCA and SGClip across both embodied agent and scene understanding tasks.

## 2 ESCA: A Framework for Embodied Agents

### 2.1 Background

**Embodied Environments.** Recent research on embodied agents has been accelerated by the availability of simulated environments such as VisualAgentBench [52] and EmbodiedBench [83], which provide rich, multimodal task suites covering navigation, manipulation, and interaction across diverse scenarios. These benchmarks pose challenges that require agents to operate in both a) low-level action spaces such as continuous control signals over robot joints, and b) high-level action spaces such as programmatic instructions and skills that abstract over low-level actions.

These tasks are typically modeled as Partially Observable Markov Decision Processes (POMDPs), represented as 7-tuple  $(S, A, \Omega, T, \mathcal{O}, L_{\text{ins}}, \mathcal{R})$ , where  $S$  is the unobservable state space,  $A$  is the task-specific action space,  $\Omega$  is the visual perception space where  $I_t \in \Omega$  is an image frame at time  $t$ ,  $T : S \times A \rightarrow S$  is the state transition dynamics,  $\mathcal{O} : S \rightarrow \Omega$  relates the underlying state to the

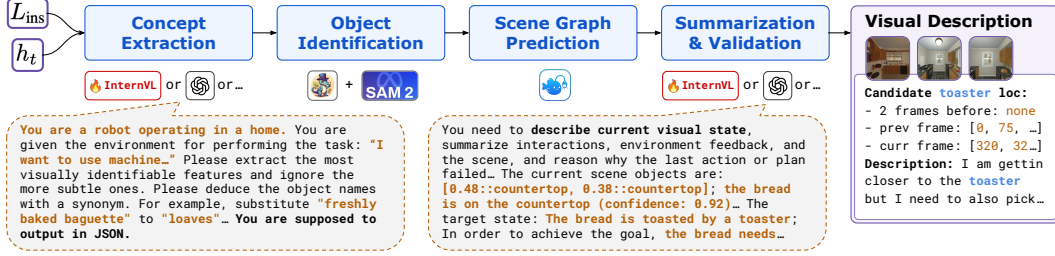

Figure 2: A detailed illustration of the visual description module, which involves concept extraction, object identification, scene graph prediction, and visual summarization. We also illustrate sample MLLM prompts used in a kitchen environment for the concept extraction and summarization steps.

observations,  $L_{ins}$  is the natural language instruction for the agent, and  $\mathcal{R} : S \rightarrow \{0, 1\}$  is the reward function indicating whether the task has been completed.

**Embodied Agents and MLLM-Based Embodied Agents.** A typical embodied agent interacts with the environment by maintaining a history of observations and actions:  $h_t = (I_0, a_0, I_1, \dots, a_{t-1}, I_t)$ , where  $a_t$  is the action taken by the agent at time  $t$ . The agent selects the next action by conditioning on the instruction  $L$  and history  $h_t$  via a policy  $\pi(a_t | L_{ins}, h_t)$ . An *MLLM-based embodied agent* realizes such a policy by leveraging a multi-modal model that processes both: a) imagery data  $I_t$ , and b) textual data, including the instruction  $L_{ins}$  and textual representations of actions  $a \in A$ .

Established by [83], recent MLLM-based agent architectures often decompose the policy evaluation process into structured stages inspired by cognitive reasoning workflows (Figure 1): 1) *Visual Description*: extracting and summarizing visual inputs; 2) *Reflection*: integrating observations with historical context to build situational awareness; 3) *Reasoning*: inferring task-relevant insights based on the combined context; 4) *Language Plan*: generating high-level plans or action sequences in natural language; 5) *Executable Plan*: translating plans into concrete actions executable by the agent.

**Challenges of MLLM-Based Embodied Agents.** Despite recent progress, MLLM-based embodied agents remain fragile in complex environments due to compounded errors across perception, reasoning, and planning [12, 36]. *Perception errors* include hallucinated objects, misrecognized entities or actions, and incorrect spatial relationships. *Reasoning errors* arise when agents fail to correctly infer spatial relations or recognize task termination states. These issues propagate into *planning*, where agents may skip critical steps or generate invalid plans due to inaccurate state estimation.

## 2.2 The ESCA Framework

At the core of ESCA is a simple yet effective idea: contextualizing MLLM-based agents with grounded, structured scene-graph information to improve visual description. Specifically, given a language instruction  $L_{ins}$  and interaction history  $h_t$ , the agent generates a multi-modal message sequence of images and text. While existing approaches rely on end-to-end MLLMs to implicitly perform this step, ESCA decomposes the process into four modular stages below (Figure 2).

**Concept Extraction.** This module extracts concepts with MLLM guided by carefully designed prompts based on the instruction  $L_{ins}$  and the history  $h_t$ . Rather than producing only free-form natural descriptions, ESCA requires the MLLM to explicitly extract structured concepts, which can be classified as follows. a) *entity classes* such as (car, knife, person, cup); b) *attributes* including physical properties (red, small, broken) and semantic states (close-by, far, moving, sitting); c) *relations* covering spatial relations (behind, above) and interactions (cutting, cooking).

Concept extraction is guided by two signals: 1) the instruction  $L_{ins}$ , which highlights target entities, attributes, or relations the agent should focus on, and 2) the visual feedback  $I_t$ , which provides spatial context such as environmental structures (e.g., barriers, pathways) and dynamic interactions (e.g., objects being manipulated). Overall, this MLLM-generated structured output provides a targeted concepts set  $\bar{c} = \{c_1, c_2, \dots\}$  for subsequent object identification and scene graph generation.

**Object Identification.** Given the extracted concepts and the agent’s visual feedback, the second module grounds these concepts to specific image segments  $\bar{\sigma} = \{\sigma_1, \sigma_2, \dots\}$  each represented by

109 a bit-mask. This step isolates visual elements in the frame that correspond to classified entities or  
110 attributes, enabling downstream semantic inference over localized visual units rather than raw pixels.

111 The object identification module is implemented using a multi-stage pipeline. First, Grounding DINO  
112 (GD) [51], a vision-language detection model, takes the extracted concepts and the visual input to  
113 predict bounding boxes for the mentioned entities. These bounding boxes are further refined into  
114 precise segmentation masks using SAM2 [62], a segmentation model that produces pixel-accurate  
115 regions. Leveraging the GD + SAM2 pipeline improves computational efficiency and offers better  
116 generalization to both attribute and relational concepts, as further detailed in the Appendix.

117 **Scene Graph Prediction.** We then construct a scene graph (SG) [31, 35, 79] by grounding the  
118 extracted concepts into structured visual elements. Specifically, the SG contains two types of  
119 probabilistic facts: 1) unary facts of the form  $p :: c_i(\sigma_j)$ , each describing an entity  $\sigma_j$  with their  
120 classes, attributes, or states represented as  $c_i$ ; 2) relational facts of the form  $p :: c_i(\sigma_j, \sigma_k)$ , each  
121 representing that a relation or an interaction  $c_i$  between a pair of grounded entities  $\sigma_j$  and  $\sigma_k$ . Notably,  
122 each predicted fact is associated with a confidence score denoted as  $p$ . This probabilistic formulation  
123 allows the SG to capture uncertainty and distributions over possible scene interpretations.

124 Implementation-wise, we build SGClip, a CLIP-based model [60] fine-tuned for open-domain scene  
125 graph prediction. The design of SGClip is guided by three aforementioned key desiderata. First, it  
126 supports open-domain concept coverage, enabling it to generalize beyond fixed taxonomies. Second,  
127 it is adaptable to extracting diverse types of information, including entity classes, attributes, and  
128 inter-object relations. Third, it produces probabilistic predictions, allowing the model to capture  
129 uncertainties. We provide a more detailed discussion of SGClip and its training in Section 3.

130 **Visual Summarization and Validation.** This module distills these multi-modal signals into a list  
131 of messages to contextualize the agent’s reasoner and planner. Concretely, the summarizer takes  
132 a prompt and is responsible for transforming the structured scene graph into natural descriptions,  
133 while also validating the consistency between the visual feedback and the underlying structured scene  
134 graph. While the summary is customizable via our transfer protocol, the set of messages include 1)  
135 the current view (and potentially historic ones) augmented with visualized bounding boxes served as  
136 markers, 2) image segments corresponding to key entities, 3) the textual description of scene graph  
137 and segments, and 4) an analysis of history actions and how they caused the current scene.

## 138 2.3 Transfer Protocol

139 To enable ESCA to generalize across different downstream tasks, we define a general transfer  
140 protocol based on the customization of two prompt templates, positioned at the entry and exit points  
141 of the entire visual description module. The goal of this unified transfer protocol is to maximize  
142 adaptability of ESCA across tasks with diverse planning strategies, action spaces, and reasoning  
143 requirements, while maintaining a consistent interface.

144 Specifically, the first prompt, the *Concept Extraction Prompt*, specifies the required JSON output  
145 format and indicates, or enumerates if possible, task-specific concepts that the agent should focus on.  
146 The second prompt, the *Visual Summarization Prompt*, guides the model to produce a contextualized  
147 summary that integrates both grounded image segments and task-specific textual elements, such  
148 as target objects, desired states, and environmental constraints. Together, these prompts provide a  
149 principled way to adapt ESCA to diverse embodied AI tasks without retraining the core system. We  
150 present a case study of the transfer protocol in Figure 2 and provide further details in Section 4.

## 151 3 SGClip Model

152 To enable the generation of spatial-temporal scene graphs in an open-domain setting, especially the  
153 embodied environments, we develop SGClip, a CLIP-based foundation model [60] for structured  
154 scene understanding. SGClip is designed to operate in an open-domain fashion, recognizing a wide  
155 and extensible set of concepts. Secondly, it must adapt to different types of concepts, while be  
156 capable of generalizing to unseen visual and textual domains. Finally, it must produce probabilistic  
157 predictions to capture uncertainty.

158 To meet these goals, SGClip builds on CLIP’s vision-language architecture, which naturally supports  
159 joint reasoning over images and textual phrases. However, deploying CLIP directly is insufficient, as

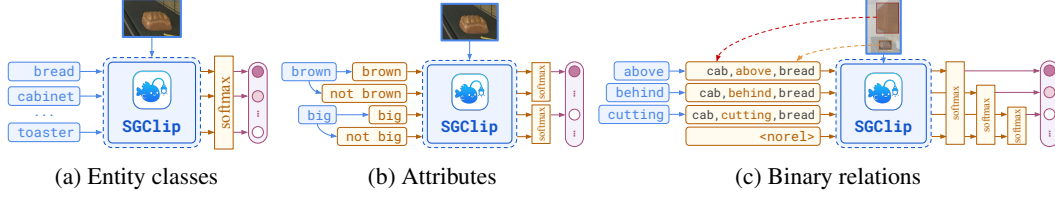

Figure 3: Illustration of the inference modes of SGClip for three types of concepts: entity classes, attributes, and binary relations. While the model stays the same, the three inference modes perform different pre- and post-processing for a more accurate semantic estimation of probabilities.

160 it lacks specialization for structured scene graph prediction. To bridge this gap, we fine-tune SGClip  
 161 to balance adaptability and generalizability. In this section, we describe 1) how to handle different  
 162 types of concepts through inference time adaptation (Section 3.1), 2) how to overcome the lack of  
 163 data by collecting a model-driven self-supervision dataset (Section 3.2), and 3) how to learn without  
 164 relying on human annotations via a self-supervised neurosymbolic learning pipeline (Section 3.3).

### 165 3.1 Model Architecture and Inference Time Adaptation

166 At its core, SGClip (Scene Graph CLIP) is a single CLIP-based model designed to score concept  
 167 relevance within an image. Formally, it operates as  $\text{SGClip}(\sigma, \bar{c}) \in \mathbb{R}^{|\bar{c}|}$ , where  $\sigma$  is the input image  
 168 and  $\bar{c}$  is the a set of candidate concepts, producing a logit score for each concept that reflects the  
 169 model’s confidence in its presence. SGClip supports three distinct inference modes to handle different  
 170 types of concepts: entity classes  $\bar{c}_{\text{class}}$ , attributes  $\bar{c}_{\text{attr}}$ , and binary relations  $\bar{c}_{\text{rela}}$ . Illustrated in Figure 3,  
 171 each mode requires a specialized formulation of the input concepts and scoring process, effectively  
 172 allowing SGClip to operate flexibly across these concept types:

173 **Entity classes.** In this setting, SGClip is used to identify the most likely entity class presented in  
 174 an image segment. Let  $\bar{c}_{\text{class}}$  denote the list of candidate entity classes. Since an entity is typically  
 175 assumed to belong to a single class, we apply softmax normalization over the logit scores produced  
 176 by SGClip for these candidates:  $\text{softmax}(\text{SGClip}(\sigma, \bar{c}_{\text{class}}))$ .

177 **Attributes.** To estimate the likelihood that a specific segment  $\sigma$  possesses a particular at-  
 178 tribute  $c$ , we construct a binary contrast between the attribute and its negation by evaluating  
 179  $\text{softmax}(\text{SGClip}(\sigma, \{c, \neg c\}))$ , where  $\neg c$  denotes the negated textual phrase (e.g., “not red” for  
 180 the attribute “red”). The first element of the resulting probability distribution corresponds to the  
 181 model’s estimated likelihood. To improve computational efficiency, we perform batched evaluation  
 182 by merging all attribute-contradiction pairs into a single concept set  $\bar{c}_{\text{attr}} = \bar{c}_{\text{attr}} \cup \{\neg c \mid c \in \bar{c}_{\text{attr}}\}$ .

183 **Binary relations.** For binary relation prediction, the goal is to determine whether a relation  $c$  holds  
 184 between two segments  $\sigma_i$  and  $\sigma_j$ . To do this, we first compute a bounding region  $\sigma_{ij}^*$  that tightly  
 185 encloses both segments. Within this region, we apply distinct color tinting to  $\sigma_i$  and  $\sigma_j$  to indicate  
 186 their directional roles (subject and object). To provide additional relational context, especially for  
 187 interactions like “cutting,” we augment the relation phrase by including the predicted entity classes  
 188 of the subject and object, generating “(robot, cutting, cabbage)”. Relation predictions are thus  
 189 conditioned on the classes of both the subject and the object. Specifically, for each segment  $\sigma_i$ , we  
 190 compute its most likely class  $\nu_i$  by selecting the top prediction from the entity class:

$$\nu_i = c_{\text{class } u}, \quad \text{where } u = \text{argmax}_{u \in 1 \dots |\bar{c}_{\text{class}}|} \text{SGClip}(\sigma_i, \bar{c}_{\text{class}})_u.$$

191 We then form the augmented relation phrase as  $(\nu_i, c, \nu_j)$ . Similar to attribute prediction, we  
 192 contrast the candidate relation with a special token  $\langle \text{norel} \rangle$  denoting “no relation,” and compute  
 193  $\text{softmax}(\text{SGClip}(\sigma_{ij}^*, \{(\nu_i, c, \nu_j), \langle \text{norel} \rangle\}))$ , to obtain the probability of whether the relation  $c$   
 194 holds between object  $i$  and  $j$ . In practice, this process is batched over all segment pairs and relation  
 195 concepts to maximize efficiency:  $\bar{c}_{\text{rela}}^* = \{(\nu_i, c, \nu_j) \mid i, j \in 1 \dots |\bar{\sigma}|, c \in \bar{c}_{\text{rela}}\} \cup \{\langle \text{norel} \rangle\}$ .

### 196 3.2 ESCA-Video-87K Dataset

197 We adopt the neurosymbolic weak-supervision pipeline introduced in LASER [31], which enables  
 198 learning fine-grained STSGs from *weak supervision signals* derived from spatial-temporal program-  
 199 matic specifications, eliminating the need for costly manual annotations. While the details of this

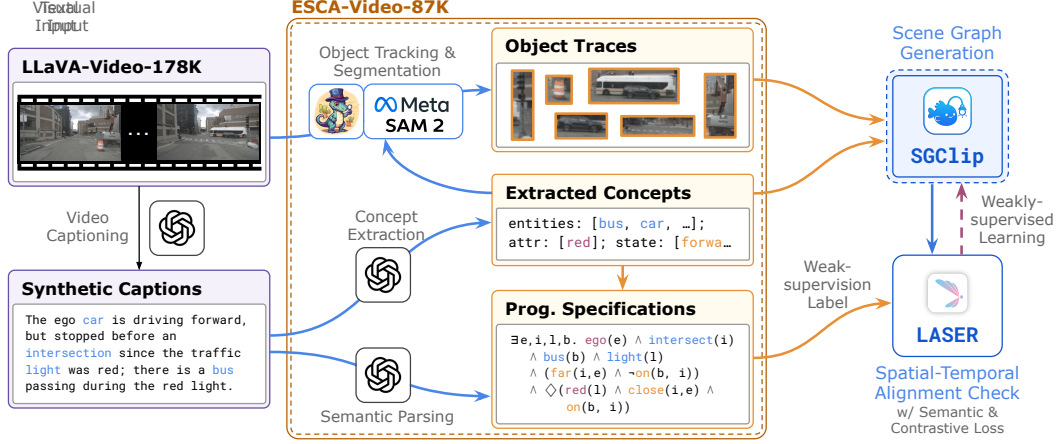

Figure 4: Illustration of the construction of ESCA-Video-87K dataset and the model-driven self-supervised fine-tuning pipeline of our SGClip model. In addition to videos and their natural language captions, ESCA-Video-87K includes object traces, open-domain concepts, and programmatic specifications for 87K video-caption pairs. The dataset is then used to train SGClip via LASER [31], a neurosymbolic learning procedure based on spatial-temporal alignment.

learning pipeline are provided in Section 3.3, we begin by introducing the ESCA-Video-87K dataset, the dataset we curate and use to train SGClip.

The ESCA-Video-87K dataset is constructed on top of the publicly available LLaVA-Video-178K dataset [89], and consists of 87K short video clips, each paired with natural language captions generated by GPT-4 [32]. As illustrated in Figure 4, these captions are first processed to extract relevant concepts which are then fed into GD [51] and SAM2 [62] to obtain object traces, which are sequences of object segmentations that evolve across multiple video frames. In addition, these concepts are also used to assist in generating spatial-temporal programmatic specifications, expressed in a linear temporal logic-based language. To construct these specifications, we develop a semantic parsing pipeline, again leveraging GPT-4, which converts high-level captions into structured temporal statements. These specifications formally describe how the semantics of object traces evolve, capturing temporal relations using operators such as “until”, “finally”, or “always”.

In summary, each data point in ESCA-Video-87K is represented as a 5-tuple  $(\bar{I}, L_{\text{cap}}, \Sigma, \bar{c}, \phi)$ , where  $\bar{I} = \{I_1, I_2, \dots\}$  is the video,  $L_{\text{cap}}$  is the associated natural language caption,  $\Sigma = \{\bar{\sigma}_1, \bar{\sigma}_2, \dots\}$  is the set of object traces,  $\bar{c} = \{c_1, c_2, \dots\}$  is the set of extracted concepts, and  $\phi$  is the spatial-temporal programmatic specification. This rich, multi-level annotation enables training models like SGClip without requiring manual scene graph labeling. We defer additional details about the dataset construction process and data statistics to the Appendix.

### 3.3 Neurosymbolic Learning Pipeline

Given the ESCA-Video-87K, our goal is to fine-tune the SGClip model using the provided object traces, concepts, and spatial-temporal programmatic specifications. This is achieved by aligning the scene graphs generated by SGClip with the expected specifications [31], where the degree of alignment serves as the learning signal (Figure 4). To perform this alignment in a differentiable manner, we leverage the Scallop programming language [46], enabling symbolic alignment checks to be integrated into end-to-end gradient-based learning.

Specifically, the alignment loss computation mirrors the inference-time adaptation procedure described in Section 3.1, where different types of concepts are processed differently but unified under the same model. The pipeline is further enhanced with *semantic losses*, derived from evaluating common-sense and temporal constraint satisfaction, as well as a *contrastive loss* that encourages the model to distinguish between matched and unmatched scene graph-specification pairs. Additional details of the training process are provided in the Appendix.

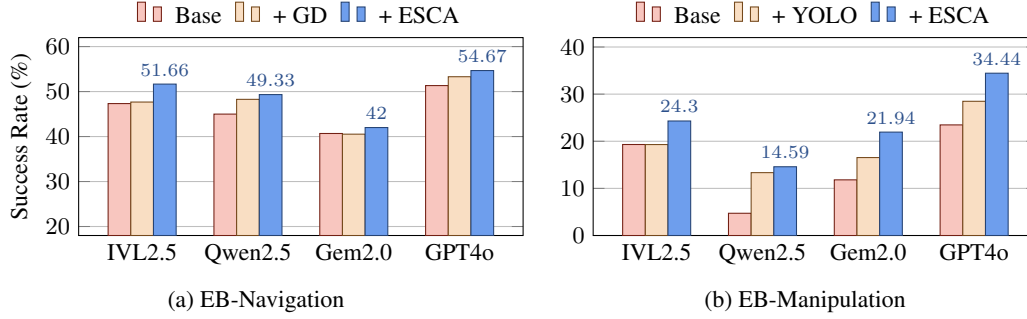

Figure 5: The overall performance on EB-Navigation and EB-Manipulation environments. We show the performance of four base models, InternVL-2.5-38B-MPO (IVL2.5), Genimi-2.0-flash (Gem2.0), Qwen2.5-VL-72B-Instruct (Qwen2.5), and GPT-4o (GPT4o), as well as their performance when accompanied with baseline visual grounding modules such as Grounding DINO (GD) or YOLO. With ESCA and SGClip, all models consistently outperform the baselines.

## 231 4 Embodied Environments and Transfer Protocol Setup

232 We evaluate our approach on EmbodiedBench [42], a benchmark suite designed to assess MLLM-  
 233 based embodied agents. We focus on two environments: EB-Navigation and EB-Manipulation, each  
 234 of which requires different levels of perception, reasoning, and control, and may benefit from a  
 235 contextualized visual description. To adapt ESCA to these tasks, we apply our transfer protocol by  
 236 designing two specialized prompts for each environment. Full prompt templates are provided in the  
 237 Appendix; here, we summarize the core challenges and how ESCA addresses them.

238 **EB-Navigation** is built on AI2-THOR [39] and focuses on visual navigation tasks where the agent  
 239 must locate target objects based on language instructions, such as “navigate to the laptop.” The agent  
 240 relies solely on egocentric visual input and textual feedback, navigating through a space using eight  
 241 low-level movement and rotation actions. Existing models often fail by generating correct high-level  
 242 plans but producing incorrect low-level actions due to poor spatial grounding from an egocentric  
 243 perspective. ESCA addresses this by generating accurate scene graphs that capture spatial relations  
 244 and object positions. With the scene graphs, we design prompts that incorporate *numerical bounding*  
 245 *box data* and *temporal movement cues*, helping the agent to localize targets more precisely.

246 **EB-Manipulation** extends VLMBench [91] for evaluating low-level robotic manipulation. The agent  
 247 controls a 7-DoF robotic arm using discretized action spaces, with additional signals such as YOLO  
 248 bounding boxes [26] and global 3D object pose estimates to assist manipulation. Existing models  
 249 struggle to ground object concepts into actionable spatial representations, leading to perception  
 250 failures that disrupt downstream planning and control. ESCA improves this by grounding target  
 251 features into precise visual segments, enabling prompts that describe object attributes, semantic  
 252 relations, and *3D spatial coordinates*, giving the agent more reliable geometric context.

## 253 5 Empirical Evaluation

254 Our experiments are designed to address two key research questions: (1) How effectively does  
 255 ESCA, together with SGClip, improve embodied agent performance through structured scene graph  
 256 generation? and (2) How generalizable and adaptable is SGClip when evaluated independently on  
 257 open-domain, zero-shot, and downstream transfer tasks? We now detail our experimental setup and  
 258 present empirical results addressing both questions.

259 **Experimental Setup.** We evaluate ESCA in EB-Navigation and EB-Manipulation, two environments  
 260 that demand fine-grained perception to support low-level control. To assess the general applicability  
 261 of ESCA, we integrate it with four diverse MLLMs: InternVL-2.5-38B-MPO [13], Qwen2.5-VL-  
 262 72B-Ins [3], Gemini-2.0-flash [57], and GPT-4o [32]. For each MLLM experiment, we use the model  
 263 for both the concept extraction and visual summarization steps (Figure 2). To further benchmark  
 264 ESCA’s impact, we compare to performance of MLLMs augmented with existing visual grounding  
 265 modules, including Grounding DINO [51] and Ultralytics-YOLO11 [26].

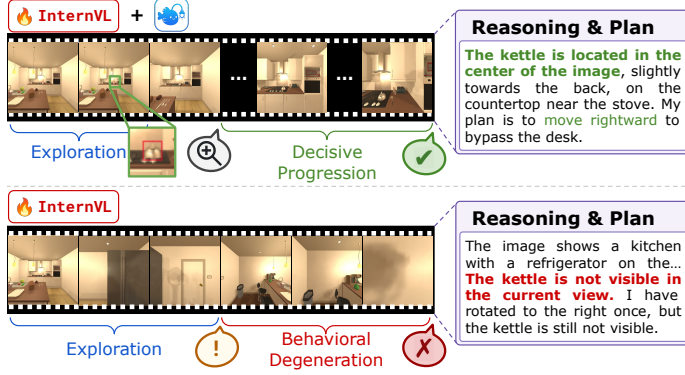

Figure 6: Two traces by InternVL with and without ESCA, on the task of “navigate to the kettle on the stove”. With ESCA, the kettle can be marked in the image and textual description, encouraging the agent to decisively move towards the goal.

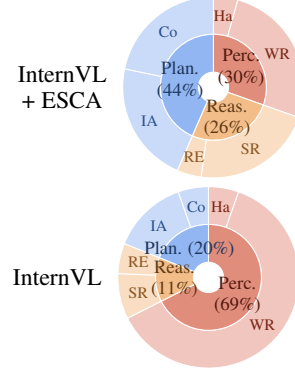

Figure 7: Error decomposition<sup>1</sup> of InternVL with or without ESCA, manually inspected on 60 EB-Navigation tasks.

For evaluating SGClip independently, we consider out-of-domain scene graph benchmarks, including OpenPVSG [82], Action Genome [33], and VidVRD [65], comparing SGClip against strong baselines such as CLIP [60], InternVL-6B [14], BIKE [77], and Text4Vis [76]. To assess SGClip’s downstream adaptability beyond structured scene graph prediction, we further test the fine-tunability on the ActivityNet action recognition dataset by applying a transfer protocol.

**ESCA for Embodied Agents.** As shown in Figure 5, ESCA-augmented MLLMs consistently outperform their non-contextualized baselines across both EB-Navigation and EB-Manipulation. Remarkably, on EB-Navigation, even the open-source InternVL-2.5, when augmented with ESCA, surpasses the base performance of the proprietary GPT-4o model. While integrating Grounding DINO or YOLO improves baseline models, ESCA provides additional, substantial gains. For example, Gemini-2.0 with ESCA achieves over 10% improvement, while GPT-4o, already boosted by YOLO, still benefits from an additional 6% performance gain on EB-Manipulation.

Through qualitative analysis of end-to-end agent behaviors, we observe that ESCA consistently improves the agent’s perceptual grounding, leading to more effective task execution. As illustrated in Figure 6, an agent powered by InternVL trained on ESCA successfully identifies the kettle early in the episode and navigates directly toward it. In contrast, the base InternVL model fails to recognize the target and ultimately collapses onto the wall. This observation is further supported by the error decomposition analysis shown in Figure 7 where we find that ESCA reduces the overall perception error rate from 69% to 30%. We provide additional detailed experimental results in the Appendix.

**Generalizability and Adaptability of SGClip.** Evaluating SGClip’s zero-shot generalization, Figure 9 shows that SGClip trained on ESCA-Video-87K consistently outperforms CLIP on OpenPVSG, Action Genome, and VidVRD, demonstrating strong out-of-domain robustness. Further, SGClip shows strong adaptability, achieving notable improvements when fine-tuned on VidVRD (details provided in the Appendix). Beyond scene graph tasks, Figure 10 highlights SGClip’s downstream transferability to action recognition on ActivityNet. Fine-tuned with only 1% of the training data, SGClip outperforms state-of-the-art zero-shot video recognition baselines. With 5% of the data (approximately 800 videos), SGClip achieves 92.10% accuracy, approaching the performance of InternVideo2-6B with end-to-end finetuning on the ActivityNet dataset.

## 6 Related Works

**Scene Graph in planning.** Scene graphs [35, 79] are symbolic representations that encode the semantic structure of an image or video by identifying objects as nodes and their relationships as edges [40, 53]. They play a central role in a variety of vision-related tasks, including visual question

<sup>1</sup>The three top-level error types are Perception, Reasoning, and Planning. The second-level errors are Hallucination, Wrong Recognition, Spatial Understanding, Spatial Reasoning, Reflection Error, Inaccurate Action, and Collision. For clarity, the figure uses these acronyms to label the different error types.

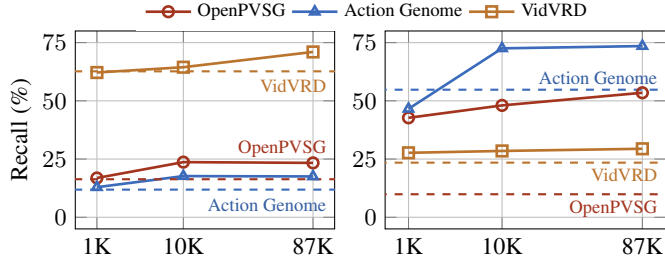

(a) Entity class prediction R@1 (b) Binary relation prediction R@10

Figure 9: The zero-shot performance of SGClip compared to CLIP (shown in dashed lines) on OpenPVSG, Action Genome, and VidVRD datasets. We showcase the Recall@1 metrics on entity class prediction, as well as the Recall@10 metrics on binary relation prediction. To illustrate data-efficiency, we include the performance of checkpoints of SGClip when trained on 1K, 10K, or 87K (full) portion of ESCA-Video-87K.

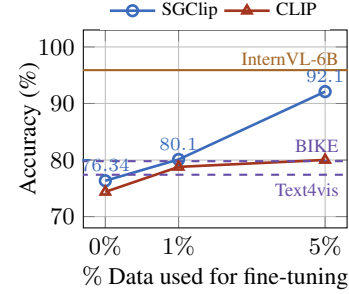

Figure 10: Down-stream fine-tunability on action recognition, evaluated on ActivityNet dataset. We also illustrate zero-shot baselines (BIKE and Text4vis) as well as a fully-supervised baseline (InternVL-6B).

answering [27, 41, 59], image captioning [84, 92], and image generation [25, 43]. More recently, scene graphs have been increasingly adopted in the domain of robotic planning, for enhanced robustness [29, 73], or verifiable planning [15, 34, 61]. To enable seamless integration with multimodal large language model (MLLM) agents, ESCA constructs scene graphs from 2D image inputs and dynamically updates them through embodied interaction with the environment.

**Embodied Agents.** Embodied agents [21, 90] are autonomous systems that perceive, reason, and interact within physical or simulated environments. To evaluate their capabilities, various benchmarks [42, 78] have been proposed, ranging from vision-language navigation [4, 16, 63] and object manipulation [18, 48] to interactive instruction following and long-horizon planning [19, 67, 68]. Recent advances in large language models (LLMs) [7, 32, 71, 72] and multimodal large language models (MLLMs) [2, 14, 47, 75] are driving progress toward general-purpose embodied agents [11, 5, 8, 30, 54, 86]. Furthermore, recent MLLMs have been trained end-to-end to directly generate low-level numerical control commands [6, 9]. ESCA introduces a general framework for augmenting vision-driven, MLLM-based agents with structured scene graph information.

**Neurosymbolic Methods with LLM and MLLM.** A growing trend for enhancing the reasoning capabilities and robustness of large language models (LLMs) is to incorporate structured representations and leverage symbolic algorithms to reason over them [22, 37, 44, 45, 85]. These efforts span diverse domains, including code generation [20, 50, 56], mathematical problem solving [17, 88], and verifiable planning [11, 49, 70, 87]. Recent work has extended this paradigm to the low level control domain, training MLLMs with structured scene graphs in an end-to-end manner [6, 58, 66]. ESCA follows this neurosymbolic direction by introducing SGClip, which is trained in MLLM-augmented self-supervised manner enabled by neuro-symbolic methodology, using structured scene graphs as an intermediate representation to guide learning.

## 7 Conclusion and Limitations

We introduced ESCA, a framework for contextualizing embodied agents through scene graph generation, powered by SGClip, a promptable, open-domain scene graph model. Through a general transfer protocol, ESCA adapts to diverse tasks and consistently improves agent performance across multiple environments and MLLMs. Beyond embodied tasks, SGClip demonstrates strong generalization and adaptability on open-domain scene graph and action recognition benchmarks.

**Limitations.** Despite its strong performance, our framework has several limitations. First, the use of large language models for high-level planning introduces latency, making it unsuitable for real-time low-level control. Second, the system relies on 2D visual inputs and lacks support for 3D representations like point clouds, limiting depth-aware reasoning and spatial precision. Finally, while ESCA leverages MLLMs to generate coherent plans, it lacks formal mechanisms for verifying intermediate and final states during execution.

## References

- [1] Anurag Ajay, Seungwook Han, Yilun Du, Shuang Li, Abhi Gupta, Tommi Jaakkola, Josh Tenenbaum, Leslie Kaelbling, Akash Srivastava, and Pulkit Agrawal. Compositional foundation models for hierarchical planning. *Advances in Neural Information Processing Systems*, 36:22304–22325, 2023.
- [2] Jinze Bai, Shuai Bai, Shusheng Yang, Shijie Wang, Sinan Tan, Peng Wang, Junyang Lin, Chang Zhou, and Jingren Zhou. Qwen-vl: A frontier large vision-language model with versatile abilities. *arXiv preprint arXiv:2308.12966*, 1(2):3, 2023.
- [3] Shuai Bai, Keqin Chen, Xuejing Liu, Jialin Wang, Wenbin Ge, Sibao Song, Kai Dang, Peng Wang, Shijie Wang, Jun Tang, Humen Zhong, Yuanzhi Zhu, Mingkun Yang, Zhaohai Li, Jianqiang Wan, Pengfei Wang, Wei Ding, Zheren Fu, Yiheng Xu, Jiabo Ye, Xi Zhang, Tianbao Xie, Zesen Cheng, Hang Zhang, Zhibo Yang, Haiyang Xu, and Junyang Lin. Qwen2.5-vl technical report, 2025.
- [4] Dhruv Batra, Aaron Gokaslan, Aniruddha Kembhavi, Oleksandr Maksymets, Roozbeh Mottaghi, Manolis Savva, Alexander Toshev, and Erik Wijmans. Objectnav revisited: On evaluation of embodied agents navigating to objects. *arXiv preprint arXiv:2006.13171*, 2020.
- [5] Suneel Belkhale, Tianli Ding, Ted Xiao, Pierre Sermanet, Quon Vuong, Jonathan Tompson, Yevgen Chebotar, Debidatta Dwibedi, and Dorsa Sadigh. Rt-h: Action hierarchies using language. *arXiv preprint arXiv:2403.01823*, 2024.
- [6] Kevin Black, Noah Brown, Danny Driess, Adnan Esmail, Michael Equi, Chelsea Finn, Niccolo Fusai, Lachy Groom, Karol Hausman, Brian Ichter, et al.  $\pi 0$ : A vision-language-action flow model for general robot control, 2024. URL <https://arxiv.org/abs/2410.24164>.
- [7] Rishi Bommasani, Drew A Hudson, Ehsan Adeli, Russ Altman, Simran Arora, Sydney von Arx, Michael S Bernstein, Jeannette Bohg, Antoine Bosselut, Emma Brunskill, et al. On the opportunities and risks of foundation models. *arXiv preprint arXiv:2108.07258*, 2021.
- [8] Anthony Brohan, Noah Brown, Justice Carbajal, Yevgen Chebotar, Xi Chen, Krzysztof Choromanski, Tianli Ding, Danny Driess, Avinava Dubey, Chelsea Finn, et al. Rt-2: Vision-language-action models transfer web knowledge to robotic control. *arXiv preprint arXiv:2307.15818*, 2023.
- [9] Anthony Brohan, Noah Brown, Justice Carbajal, Yevgen Chebotar, Joseph Dabis, Chelsea Finn, Keerthana Gopalakrishnan, Karol Hausman, Alex Herzog, Jasmine Hsu, et al. Rt-1: Robotics transformer for real-world control at scale. *arXiv preprint arXiv:2212.06817*, 2022.
- [10] Fabian Caba Heilbron, Victor Escorcia, Bernard Ghanem, and Juan Carlos Nieves. Activitynet: A large-scale video benchmark for human activity understanding. In *Proceedings of the IEEE conference on computer vision and pattern recognition*, pages 961–970, 2015.
- [11] Alessio Capitanelli and Fulvio Mastrogiovanni. A framework for neurosymbolic robot action planning using large language models. *Frontiers in Neurorobotics*, 18:1342786, 2024.
- [12] Yanan Chen, Ali Pesaranghader, Tanmana Sadhu, and Dong Hoon Yi. Can we rely on llm agents to draft long-horizon plans? let’s take travelplanner as an example, 2024.
- [13] Zhe Chen, Weiyun Wang, Yue Cao, Yangzhou Liu, Zhangwei Gao, Erfei Cui, Jinguo Zhu, Shenglong Ye, Hao Tian, Zhaoyang Liu, Lixin Gu, Xuehui Wang, Qingyun Li, Yimin Ren, Zixuan Chen, Jiapeng Luo, Jiahao Wang, Tan Jiang, Bo Wang, Conghui He, Botian Shi, Xingcheng Zhang, Han Lv, Yi Wang, Wenqi Shao, Pei Chu, Zhongying Tu, Tong He, Zhiyong Wu, Huipeng Deng, Jiaye Ge, Kai Chen, Kaipeng Zhang, Limin Wang, Min Dou, Lewei Lu, Xizhou Zhu, Tong Lu, Dahua Lin, Yu Qiao, Jifeng Dai, and Wenhai Wang. Expanding performance boundaries of open-source multimodal models with model, data, and test-time scaling, 2025.
- [14] Zhe Chen, Jiannan Wu, Wenhai Wang, Weijie Su, Guo Chen, Sen Xing, Muyan Zhong, Qinglong Zhang, Xizhou Zhu, Lewei Lu, et al. Internvl: Scaling up vision foundation models and aligning for generic visual-linguistic tasks. In *Proceedings of the IEEE/CVF conference on computer vision and pattern recognition*, pages 24185–24198, 2024.
- [15] Zhirui Dai, Arash Asgharivaskasi, Thai Duong, Shusen Lin, Maria-Elizabeth Tzes, George Pappas, and Nikolay Atanasov. Optimal scene graph planning with large language model guidance, 2024.
- [16] Matt Deitke, Winson Han, Alvaro Herrasti, Aniruddha Kembhavi, Eric Kolve, Roozbeh Mottaghi, Jordi Salvador, Dustin Schwenk, Eli VanderBilt, Matthew Wallingford, et al. Robothor: An open simulation-to-real embodied ai platform. In *Proceedings of the IEEE/CVF conference on computer vision and pattern recognition*, pages 3164–3174, 2020.
- [17] Aniket Didolkar, Anirudh Goyal, Nan Rosemary Ke, Siyuan Guo, Michal Valko, Timothy Lillicrap, Danilo Jimenez Rezende, Yoshua Bengio, Michael C Mozer, and Sanjeev Arora. Metacognitive capabilities of llms: An exploration in mathematical problem solving. *Advances in Neural Information Processing Systems*, 37:19783–19812, 2024.

- [18] Kiana Ehsani, Winson Han, Alvaro Herrasti, Eli VanderBilt, Luca Weihs, Eric Kolve, Aniruddha Kembhavi, and Roozbeh Mottaghi. Manipulator: A framework for visual object manipulation. In *Proceedings of the IEEE/CVF conference on computer vision and pattern recognition*, pages 4497–4506, 2021.
- [19] Linxi Fan, Guanzhi Wang, Yunfan Jiang, Ajay Mandlekar, Yuncong Yang, Haoyi Zhu, Andrew Tang, De-An Huang, Yuke Zhu, and Anima Anandkumar. Minedojo: Building open-ended embodied agents with internet-scale knowledge. *Advances in Neural Information Processing Systems*, 35:18343–18362, 2022.
- [20] James Finnie-Ansley, Paul Denny, Brett A Becker, Andrew Luxton-Reilly, and James Prather. The robots are coming: Exploring the implications of openai codex on introductory programming. In *Proceedings of the 24th Australasian computing education conference*, pages 10–19, 2022.
- [21] Stan Franklin. Autonomous agents as embodied ai. *Cybernetics & Systems*, 28(6):499–520, 1997.
- [22] Luyu Gao, Aman Madaan, Shuyan Zhou, Uri Alon, Pengfei Liu, Yiming Yang, Jamie Callan, and Graham Neubig. Pal: Program-aided language models. In *International Conference on Machine Learning*, pages 10764–10799. PMLR, 2023.
- [23] Raghav Goyal, Samira Ebrahimi Kahou, Vincent Michalski, Joanna Materzynska, Susanne Westphal, Heuna Kim, Valentin Haenel, Ingo Fruend, Peter Yianilos, Moritz Mueller-Freitag, et al. The "something something" video database for learning and evaluating visual common sense. In *Proceedings of the IEEE international conference on computer vision*, pages 5842–5850, 2017.
- [24] Kristen Grauman, Andrew Westbury, Eugene Byrne, Zachary Chavis, Antonino Furnari, Rohit Girdhar, Jackson Hamburger, Hao Jiang, Miao Liu, Xingyu Liu, et al. Ego4d: Around the world in 3,000 hours of egocentric video. In *Proceedings of the IEEE/CVF conference on computer vision and pattern recognition*, pages 18995–19012, 2022.
- [25] Roei Herzig, Amir Bar, Huijuan Xu, Gal Chechik, Trevor Darrell, and Amir Globerson. Learning canonical representations for scene graph to image generation. In *Computer Vision—ECCV 2020: 16th European Conference, Glasgow, UK, August 23–28, 2020, Proceedings, Part XXVI 16*, pages 210–227. Springer, 2020.
- [26] Priyanto Hidayatullah, Nurjannah Syakrani, Muhammad Rizqi Sholahuddin, Trisna Gelar, and Refdinal Tubagus. Yolov8 to yolo11: A comprehensive architecture in-depth comparative review, 2025.
- [27] Marcel Hildebrandt, Hang Li, Rajat Koner, Volker Tresp, and Stephan Günnemann. Scene graph reasoning for visual question answering. *arXiv preprint arXiv:2007.01072*, 2020.
- [28] Matthew Honnibal, Ines Montani, Sofie Van Landeghem, Adriane Boyd, et al. spacy: Industrial-strength natural language processing in python. 2020.
- [29] Joy Hsu, Jiayuan Mao, Josh Tenenbaum, and Jiajun Wu. What’s left? concept grounding with logic-enhanced foundation models. *Advances in Neural Information Processing Systems*, 36:38798–38814, 2023.
- [30] Cassie Huang and Li Zhang. On the limit of language models as planning formalizers, 2025.
- [31] Jiani Huang, Ziyang Li, Mayur Naik, and Ser-Nam Lim. LASER: A neuro-symbolic framework for learning spatio-temporal scene graphs with weak supervision. In *The Thirteenth International Conference on Learning Representations*, 2025.
- [32] Aaron Hurst, Adam Lerer, Adam P Goucher, Adam Perelman, Aditya Ramesh, Aidan Clark, AJ Ostrow, Akila Welihinda, Alan Hayes, Alec Radford, et al. Gpt-4o system card. *arXiv preprint arXiv:2410.21276*, 2024.
- [33] Jingwei Ji, Ranjay Krishna, Li Fei-Fei, and Juan Carlos Niebles. Action genome: Actions as compositions of spatio-temporal scene graphs. In *Proceedings of the IEEE/CVF conference on computer vision and pattern recognition*, pages 10236–10247, 2020.
- [34] Ziyuan Jiao, Yida Niu, Zeyu Zhang, Song-Chun Zhu, Yixin Zhu, and Hangxin Liu. Sequential manipulation planning on scene graph. In *2022 IEEE/RSJ International Conference on Intelligent Robots and Systems (IROS)*, pages 8203–8210. IEEE, 2022.
- [35] Justin Johnson, Ranjay Krishna, Michael Stark, Li-Jia Li, David Shamma, Michael Bernstein, and Li Fei-Fei. Image retrieval using scene graphs. In *Proceedings of the IEEE conference on computer vision and pattern recognition*, pages 3668–3678, 2015.
- [36] Subbarao Kambhampati, Karthik Valmeekam, Lin Guan, Mudit Verma, Kaya Stechly, Siddhant Bhambri, Lucas Saldyt, and Anil Murthy. Llms can’t plan, but can help planning in llm-modulo frameworks, 2024.
- [37] Nora Kassner, Oyvind Tafjord, Hinrich Schütze, and Peter Clark. Beliefbank: Adding memory to a pre-trained language model for a systematic notion of belief. *arXiv preprint arXiv:2109.14723*, 2021.
- [38] Will Kay, Joao Carreira, Karen Simonyan, Brian Zhang, Chloe Hillier, Sudheendra Vijayanarasimhan, Fabio Viola, Tim Green, Trevor Back, Paul Natsev, et al. The kinetics human action video dataset. *arXiv preprint arXiv:1705.06950*, 2017.

- [39] Eric Kolve, Roozbeh Mottaghi, Daniel Gordon, Yuke Zhu, Abhinav Gupta, and Ali Farhadi. AI2-THOR: an interactive 3d environment for visual AI. *CoRR*, abs/1712.05474, 2017.
- [40] Ranjay Krishna, Yuke Zhu, Oliver Groth, Justin Johnson, Kenji Hata, Joshua Kravitz, Stephanie Chen, Yannis Kalantidis, Li-Jia Li, David A Shamma, et al. Visual genome: Connecting language and vision using crowdsourced dense image annotations. *International journal of computer vision*, 123:32–73, 2017.
- [41] Soohyeong Lee, Ju-Whan Kim, Youngmin Oh, and Joo Hyuk Jeon. Visual question answering over scene graph. In *2019 First International Conference on Graph Computing (GC)*, pages 45–50. IEEE, 2019.
- [42] Manling Li, Shiyu Zhao, Qineng Wang, Kangrui Wang, Yu Zhou, Sanjana Srivastava, Cem Gokmen, Tony Lee, Erran Li Li, Ruohan Zhang, et al. Embodied agent interface: Benchmarking llms for embodied decision making. *Advances in Neural Information Processing Systems*, 37:100428–100534, 2024.
- [43] Yikang Li, Tao Ma, Yeqi Bai, Nan Duan, Sining Wei, and Xiaogang Wang. Pastegan: A semi-parametric method to generate image from scene graph. *Advances in Neural Information Processing Systems*, 32, 2019.
- [44] Ziyang Li, Saikat Dutta, and Mayur Naik. Iris: Llm-assisted static analysis for detecting security vulnerabilities. In *The Thirteenth International Conference on Learning Representations*, 2025.
- [45] Ziyang Li, Jiani Huang, Jason Liu, Felix Zhu, Eric Zhao, William Dodds, Neelay Velingker, Rajeev Alur, and Mayur Naik. Relational programming with foundational models. In *Proceedings of the AAAI Conference on Artificial Intelligence*, volume 38, pages 10635–10644, 2024.
- [46] Ziyang Li, Jiani Huang, and Mayur Naik. Scallop: A language for neurosymbolic programming, 2023.
- [47] Bin Lin, Yang Ye, Bin Zhu, Jiayi Cui, Munan Ning, Peng Jin, and Li Yuan. Video-llava: Learning united visual representation by alignment before projection. *arXiv preprint arXiv:2311.10122*, 2023.
- [48] Xingyu Lin, Yufei Wang, Jake Olkin, and David Held. Softgym: Benchmarking deep reinforcement learning for deformable object manipulation. In *Conference on Robot Learning*, pages 432–448. PMLR, 2021.
- [49] Bo Liu, Yuqian Jiang, Xiaohan Zhang, Qiang Liu, Shiqi Zhang, Joydeep Biswas, and Peter Stone. Llm+p: Empowering large language models with optimal planning proficiency, 2023.
- [50] Fang Liu, Yang Liu, Lin Shi, Houkun Huang, Ruifeng Wang, Zhen Yang, Li Zhang, Zhongqi Li, and Yuchi Ma. Exploring and evaluating hallucinations in llm-powered code generation. *arXiv preprint arXiv:2404.00971*, 2024.
- [51] Shilong Liu, Zhaoyang Zeng, Tianhe Ren, Feng Li, Hao Zhang, Jie Yang, Qing Jiang, Chunyuan Li, Jianwei Yang, Hang Su, Jun Zhu, and Lei Zhang. Grounding dino: Marrying dino with grounded pre-training for open-set object detection, 2024.
- [52] Xiao Liu, Tianjie Zhang, Yu Gu, Iat Long Iong, Yifan Xu, Xixuan Song, Shudan Zhang, Hanyu Lai, Xinyi Liu, Hanlin Zhao, Jiada Sun, Xinyue Yang, Yu Yang, Zehan Qi, Shuntian Yao, Xueqiao Sun, Siyi Cheng, Qinkai Zheng, Hao Yu, Hanchen Zhang, Wenyi Hong, Ming Ding, Lihang Pan, Xiaotao Gu, Aohan Zeng, Zhengxiao Du, Chan Hee Song, Yu Su, Yuxiao Dong, and Jie Tang. Visualagentbench: Towards large multimodal models as visual foundation agents, 2024.
- [53] Cewu Lu, Ranjay Krishna, Michael Bernstein, and Li Fei-Fei. Visual relationship detection with language priors. In *Computer Vision—ECCV 2016: 14th European Conference, Amsterdam, The Netherlands, October 11–14, 2016, Proceedings, Part I 14*, pages 852–869. Springer, 2016.
- [54] Yecheng Jason Ma, William Liang, Guanzhi Wang, De-An Huang, Osbert Bastani, Dinesh Jayaraman, Yuke Zhu, Linxi Fan, and Anima Anandkumar. Eureka: Human-level reward design via coding large language models. *ICLR*, 2024.
- [55] Damiano Marsili, Rohun Agrawal, Yisong Yue, and Georgia Gkioxari. Visual agentic ai for spatial reasoning with a dynamic api, 2025.
- [56] Theo X Olausson, Alex Gu, Benjamin Lipkin, Cedegao E Zhang, Armando Solar-Lezama, Joshua B Tenenbaum, and Roger Levy. Linc: A neurosymbolic approach for logical reasoning by combining language models with first-order logic provers. *arXiv preprint arXiv:2310.15164*, 2023.
- [57] Sundar Pichai, Demis Hassabis, and Koray Kavukcuoglu. Introducing gemini 2.0: Our new ai model for the agentic era, Dec 2024.
- [58] Jianing Qian, Yunshuang Li, Bernadette Bucher, and Dinesh Jayaraman. Task-oriented hierarchical object decomposition for visuomotor control. *arXiv preprint arXiv:2411.01284*, 2024.
- [59] Tianwen Qian, Jingjing Chen, Shaoxiang Chen, Bo Wu, and Yu-Gang Jiang. Scene graph refinement network for visual question answering. *IEEE Transactions on Multimedia*, 25:3950–3961, 2022.
- [60] Alec Radford, Jong Wook Kim, Chris Hallacy, Aditya Ramesh, Gabriel Goh, Sandhini Agarwal, Girish Sastry, Amanda Askell, Pamela Mishkin, Jack Clark, Gretchen Krueger, and Ilya Sutskever. Learning transferable visual models from natural language supervision. *CoRR*, abs/2103.00020, 2021.

- [61] Krishan Rana, Jesse Haviland, Sourav Garg, Jad Abou-Chakra, Ian Reid, and Niko Suenderhauf. Sayplan: Grounding large language models using 3d scene graphs for scalable robot task planning. *arXiv preprint arXiv:2307.06135*, 2023.
- [62] Nikhila Ravi, Valentin Gabeur, Yuan-Ting Hu, Ronghang Hu, Chaitanya Ryali, Tengyu Ma, Haitham Khedr, Roman Rädle, Chloe Rolland, Laura Gustafson, Eric Mintun, Junting Pan, Kalyan Vasudev Alwala, Nicolas Carion, Chao-Yuan Wu, Ross Girshick, Piotr Dollár, and Christoph Feichtenhofer. Sam 2: Segment anything in images and videos, 2024.
- [63] Manolis Savva, Abhishek Kadian, Oleksandr Maksymets, Yili Zhao, Erik Wijmans, Bhavana Jain, Julian Straub, Jia Liu, Vladlen Koltun, Jitendra Malik, et al. Habitat: A platform for embodied ai research. In *Proceedings of the IEEE/CVF international conference on computer vision*, pages 9339–9347, 2019.
- [64] Xindi Shang, Donglin Di, Junbin Xiao, Yu Cao, Xun Yang, and Tat-Seng Chua. Annotating objects and relations in user-generated videos. In *Proceedings of the 2019 on International Conference on Multimedia Retrieval*, pages 279–287. ACM, 2019.
- [65] Xindi Shang, Tongwei Ren, Jingfan Guo, Hanwang Zhang, and Tat-Seng Chua. Video visual relation detection. In *Proceedings of the 25th ACM International Conference on Multimedia*, pages 1300–1308, 2017.
- [66] Junyao Shi, Jianing Qian, Yecheng Jason Ma, and Dinesh Jayaraman. Composing pre-trained object-centric representations for robotics from "what" and "where" foundation models. In *2024 IEEE International Conference on Robotics and Automation (ICRA)*, pages 15424–15432. IEEE, 2024.
- [67] Mohit Shridhar, Jesse Thomason, Daniel Gordon, Yonatan Bisk, Winson Han, Roozbeh Mottaghi, Luke Zettlemoyer, and Dieter Fox. Alfred: A benchmark for interpreting grounded instructions for everyday tasks. In *Proceedings of the IEEE/CVF conference on computer vision and pattern recognition*, pages 10740–10749, 2020.
- [68] Mohit Shridhar, Xingdi Yuan, Marc-Alexandre Côté, Yonatan Bisk, Adam Trischler, and Matthew Hausknecht. Alfworld: Aligning text and embodied environments for interactive learning. *arXiv preprint arXiv:2010.03768*, 2020.
- [69] Gunnar A Sigurdsson, Gül Varol, Xiaolong Wang, Ali Farhadi, Ivan Laptev, and Abhinav Gupta. Hollywood in homes: Crowdsourcing data collection for activity understanding. In *Computer Vision—ECCV 2016: 14th European Conference, Amsterdam, The Netherlands, October 11–14, 2016, Proceedings, Part I 14*, pages 510–526. Springer, 2016.
- [70] Tom Silver, Varun Hariprasad, Reece S Shuttleworth, Nishanth Kumar, Tomás Lozano-Pérez, and Leslie Pack Kaelbling. Pddl planning with pretrained large language models. In *NeurIPS 2022 foundation models for decision making workshop*, 2022.
- [71] Gemini Team, Rohan Anil, Sebastian Borgeaud, Jean-Baptiste Alayrac, Jiahui Yu, Radu Soricut, Johan Schalkwyk, Andrew M Dai, Anja Hauth, Katie Millican, et al. Gemini: a family of highly capable multimodal models. *arXiv preprint arXiv:2312.11805*, 2023.
- [72] Hugo Touvron, Thibaut Lavril, Gautier Izacard, Xavier Martinet, Marie-Anne Lachaux, Timothée Lacroix, Baptiste Rozière, Naman Goyal, Eric Hambro, Faisal Azhar, et al. Llama: Open and efficient foundation language models. *arXiv preprint arXiv:2302.13971*, 2023.
- [73] Renhao Wang, Jiayuan Mao, Joy Hsu, Hang Zhao, Jiajun Wu, and Yang Gao. Programmatically grounded, compositionally generalizable robotic manipulation. *arXiv preprint arXiv:2304.13826*, 2023.
- [74] Yi Wang, Yinan He, Yizhuo Li, Kunchang Li, Jiashuo Yu, Xin Ma, Xinhao Li, Guo Chen, Xinyuan Chen, Yaohui Wang, et al. Internvid: A large-scale video-text dataset for multimodal understanding and generation. *arXiv preprint arXiv:2307.06942*, 2023.
- [75] Chenfei Wu, Shengming Yin, Weizhen Qi, Xiaodong Wang, Zecheng Tang, and Nan Duan. Visual chatgpt: Talking, drawing and editing with visual foundation models. *arXiv preprint arXiv:2303.04671*, 2023.
- [76] Wenhao Wu, Zhun Sun, and Wanli Ouyang. Revisiting classifier: Transferring vision-language models for video recognition, 2023.
- [77] Wenhao Wu, Xiaohan Wang, Haipeng Luo, Jingdong Wang, Yi Yang, and Wanli Ouyang. Bidirectional cross-modal knowledge exploration for video recognition with pre-trained vision-language models. In *Proceedings of the IEEE/CVF conference on computer vision and pattern recognition*, pages 6620–6630, 2023.
- [78] Fei Xia, Amir R Zamir, Zhiyang He, Alexander Sax, Jitendra Malik, and Silvio Savarese. Gibson env: Real-world perception for embodied agents. In *Proceedings of the IEEE conference on computer vision and pattern recognition*, pages 9068–9079, 2018.
- [79] Danfei Xu, Yuke Zhu, Christopher B Choy, and Li Fei-Fei. Scene graph generation by iterative message passing. In *Proceedings of the IEEE conference on computer vision and pattern recognition*, pages 5410–5419, 2017.

- [80] Hongwei Xue, Tiankai Hang, Yanhong Zeng, Yuchong Sun, Bei Liu, Huan Yang, Jianlong Fu, and Baining Guo. Advancing high-resolution video-language representation with large-scale video transcriptions. In *Proceedings of the IEEE/CVF Conference on Computer Vision and Pattern Recognition*, pages 5036–5045, 2022.
- [81] Jihan Yang, Shusheng Yang, Anjali W. Gupta, Rilyn Han, Li Fei-Fei, and Saining Xie. Thinking in space: How multimodal large language models see, remember, and recall spaces, 2024.
- [82] Jingkang Yang, Wenxuan Peng, Xiangtai Li, Zujin Guo, Liangyu Chen, Bo Li, Zheng Ma, Kaiyang Zhou, Wayne Zhang, Chen Change Loy, and Ziwei Liu. Panoptic video scene graph generation, 2023.
- [83] Rui Yang, Hanyang Chen, Junyu Zhang, Mark Zhao, Cheng Qian, Kangrui Wang, Qineng Wang, Teja Venkat Koripella, Marziyeh Movahedi, Manling Li, et al. Embodiedbench: Comprehensive benchmarking multi-modal large language models for vision-driven embodied agents. *arXiv preprint arXiv:2502.09560*, 2025.
- [84] Xu Yang, Kaihua Tang, Hanwang Zhang, and Jianfei Cai. Auto-encoding scene graphs for image captioning. In *Proceedings of the IEEE/CVF conference on computer vision and pattern recognition*, pages 10685–10694, 2019.
- [85] Hanlin Zhang, Jiani Huang, Ziyang Li, Mayur Naik, and Eric Xing. Improved logical reasoning of language models via differentiable symbolic programming. *arXiv preprint arXiv:2305.03742*, 2023.
- [86] Hongxin Zhang, Weihua Du, Jiaming Shan, Qinzhong Zhou, Yilun Du, Joshua B Tenenbaum, Tianmin Shu, and Chuang Gan. Building cooperative embodied agents modularly with large language models. *arXiv preprint arXiv:2307.02485*, 2023.
- [87] Li Zhang, Peter Jansen, Tianyi Zhang, Peter Clark, Chris Callison-Burch, and Niket Tandon. Pddlego: Iterative planning in textual environments. *arXiv preprint arXiv:2405.19793*, 2024.
- [88] Renrui Zhang, Dongzhi Jiang, Yichi Zhang, Haokun Lin, Ziyu Guo, Pengshuo Qiu, Aojun Zhou, Pan Lu, Kai-Wei Chang, Yu Qiao, et al. Mathverse: Does your multi-modal llm truly see the diagrams in visual math problems? In *European Conference on Computer Vision*, pages 169–186. Springer, 2024.
- [89] Yuanhan Zhang, Jinming Wu, Wei Li, Bo Li, Zejun Ma, Ziwei Liu, and Chunyuan Li. Video instruction tuning with synthetic data, 2024.
- [90] Zhonghan Zhao, Wenhao Chai, Xuan Wang, Boyi Li, Shengyu Hao, Shidong Cao, Tian Ye, and Gaoang Wang. See and think: Embodied agent in virtual environment. In *European Conference on Computer Vision*, pages 187–204. Springer, 2024.
- [91] Kaizhi Zheng, Xiaotong Chen, Odest Chadwicke Jenkins, and Xin Eric Wang. Vlmbench: A compositional benchmark for vision-and-language manipulation, 2022.
- [92] Yiwu Zhong, Liwei Wang, Jianshu Chen, Dong Yu, and Yin Li. Comprehensive image captioning via scene graph decomposition. In *Computer Vision—ECCV 2020: 16th European Conference, Glasgow, UK, August 23–28, 2020, Proceedings, Part XIV 16*, pages 211–229. Springer, 2020.
- [93] Luowei Zhou, Chenliang Xu, and Jason J Corso. Procnets: Learning to segment procedures in untrimmed and unconstrained videos. *arXiv preprint arXiv:1703.09788*, 2(6):7, 2017.
- [94] Bin Zhu, Bin Lin, Munan Ning, Yang Yan, Jiaxi Cui, HongFa Wang, Yatian Pang, Wenhao Jiang, Junwu Zhang, Zongwei Li, Wancai Zhang, Zhifeng Li, Wei Liu, and Li Yuan. Languagebind: Extending video-language pretraining to n-modality by language-based semantic alignment, 2024.

## 8 Checklist

### 1. Claims

Question: Do the main claims made in the abstract and introduction accurately reflect the paper's contributions and scope?

Answer: [\[Yes\]](#)

Justification: We have made four claims in the introduction. All of them are supported by our pipeline and experimental results.

Guidelines:

- The answer NA means that the abstract and introduction do not include the claims made in the paper.
- The abstract and/or introduction should clearly state the claims made, including the contributions made in the paper and important assumptions and limitations. A No or NA answer to this question will not be perceived well by the reviewers.
- The claims made should match theoretical and experimental results, and reflect how much the results can be expected to generalize to other settings.
- It is fine to include aspirational goals as motivation as long as it is clear that these goals are not attained by the paper.

### 2. Limitations

Question: Does the paper discuss the limitations of the work performed by the authors?

Answer: [\[Yes\]](#) .

Justification: We have an explicit section dedicated to conclusion, limitation, and future works.

Guidelines:

- The answer NA means that the paper has no limitation while the answer No means that the paper has limitations, but those are not discussed in the paper.
- The authors are encouraged to create a separate "Limitations" section in their paper.
- The paper should point out any strong assumptions and how robust the results are to violations of these assumptions (e.g., independence assumptions, noiseless settings, model well-specification, asymptotic approximations only holding locally). The authors should reflect on how these assumptions might be violated in practice and what the implications would be.
- The authors should reflect on the scope of the claims made, e.g., if the approach was only tested on a few datasets or with a few runs. In general, empirical results often depend on implicit assumptions, which should be articulated.
- The authors should reflect on the factors that influence the performance of the approach. For example, a facial recognition algorithm may perform poorly when image resolution is low or images are taken in low lighting. Or a speech-to-text system might not be used reliably to provide closed captions for online lectures because it fails to handle technical jargon.
- The authors should discuss the computational efficiency of the proposed algorithms and how they scale with dataset size.
- If applicable, the authors should discuss possible limitations of their approach to address problems of privacy and fairness.
- While the authors might fear that complete honesty about limitations might be used by reviewers as grounds for rejection, a worse outcome might be that reviewers discover limitations that aren't acknowledged in the paper. The authors should use their best judgment and recognize that individual actions in favor of transparency play an important role in developing norms that preserve the integrity of the community. Reviewers will be specifically instructed to not penalize honesty concerning limitations.

### 3. Theory assumptions and proofs

Question: For each theoretical result, does the paper provide the full set of assumptions and a complete (and correct) proof?

Answer: [NA] .

Justification: We do not include theoretical results.

Guidelines:

- The answer NA means that the paper does not include theoretical results.
- All the theorems, formulas, and proofs in the paper should be numbered and cross-referenced.
- All assumptions should be clearly stated or referenced in the statement of any theorems.
- The proofs can either appear in the main paper or the supplemental material, but if they appear in the supplemental material, the authors are encouraged to provide a short proof sketch to provide intuition.
- Inversely, any informal proof provided in the core of the paper should be complemented by formal proofs provided in appendix or supplemental material.
- Theorems and Lemmas that the proof relies upon should be properly referenced.

#### 4. Experimental result reproducibility

Question: Does the paper fully disclose all the information needed to reproduce the main experimental results of the paper to the extent that it affects the main claims and/or conclusions of the paper (regardless of whether the code and data are provided or not)?

Answer: [Yes] .

Justification: We include the experimental details in the appendix, and our full code base in supplementary material.

Guidelines:

- The answer NA means that the paper does not include experiments.
- If the paper includes experiments, a No answer to this question will not be perceived well by the reviewers: Making the paper reproducible is important, regardless of whether the code and data are provided or not.
- If the contribution is a dataset and/or model, the authors should describe the steps taken to make their results reproducible or verifiable.
- Depending on the contribution, reproducibility can be accomplished in various ways. For example, if the contribution is a novel architecture, describing the architecture fully might suffice, or if the contribution is a specific model and empirical evaluation, it may be necessary to either make it possible for others to replicate the model with the same dataset, or provide access to the model. In general, releasing code and data is often one good way to accomplish this, but reproducibility can also be provided via detailed instructions for how to replicate the results, access to a hosted model (e.g., in the case of a large language model), releasing of a model checkpoint, or other means that are appropriate to the research performed.
- While NeurIPS does not require releasing code, the conference does require all submissions to provide some reasonable avenue for reproducibility, which may depend on the nature of the contribution. For example
  - (a) If the contribution is primarily a new algorithm, the paper should make it clear how to reproduce that algorithm.
  - (b) If the contribution is primarily a new model architecture, the paper should describe the architecture clearly and fully.
  - (c) If the contribution is a new model (e.g., a large language model), then there should either be a way to access this model for reproducing the results or a way to reproduce the model (e.g., with an open-source dataset or instructions for how to construct the dataset).
  - (d) We recognize that reproducibility may be tricky in some cases, in which case authors are welcome to describe the particular way they provide for reproducibility. In the case of closed-source models, it may be that access to the model is limited in some way (e.g., to registered users), but it should be possible for other researchers to have some path to reproducing or verifying the results.

#### 5. Open access to data and code

Question: Does the paper provide open access to the data and code, with sufficient instructions to faithfully reproduce the main experimental results, as described in supplemental material?

Answer: [Yes] .

Justification: In the supplementary material, we provide our codebase for (1) preprocessing the ESCA-Video-87K dataset and (2) implementing the ESCA pipeline and transfer protocols. We will release the dataset and open-source the code upon paper acceptance.

Guidelines:

- The answer NA means that paper does not include experiments requiring code.
- Please see the NeurIPS code and data submission guidelines (<https://nips.cc/public/guides/CodeSubmissionPolicy>) for more details.
- While we encourage the release of code and data, we understand that this might not be possible, so “No” is an acceptable answer. Papers cannot be rejected simply for not including code, unless this is central to the contribution (e.g., for a new open-source benchmark).
- The instructions should contain the exact command and environment needed to run to reproduce the results. See the NeurIPS code and data submission guidelines (<https://nips.cc/public/guides/CodeSubmissionPolicy>) for more details.
- The authors should provide instructions on data access and preparation, including how to access the raw data, preprocessed data, intermediate data, and generated data, etc.
- The authors should provide scripts to reproduce all experimental results for the new proposed method and baselines. If only a subset of experiments are reproducible, they should state which ones are omitted from the script and why.
- At submission time, to preserve anonymity, the authors should release anonymized versions (if applicable).
- Providing as much information as possible in supplemental material (appended to the paper) is recommended, but including URLs to data and code is permitted.

## 6. Experimental setting/details

Question: Does the paper specify all the training and test details (e.g., data splits, hyperparameters, how they were chosen, type of optimizer, etc.) necessary to understand the results?

Answer: [Yes] .

Justification: We include these specifications in the appendix.

Guidelines:

- The answer NA means that the paper does not include experiments.
- The experimental setting should be presented in the core of the paper to a level of detail that is necessary to appreciate the results and make sense of them.
- The full details can be provided either with the code, in appendix, or as supplemental material.

## 7. Experiment statistical significance

Question: Does the paper report error bars suitably and correctly defined or other appropriate information about the statistical significance of the experiments?

Answer: [No] .

Justification: We evaluate large language models with the temperature set to 0 to reduce output variance. Moreover, querying these models multiple times with the same prompt is neither environmentally sustainable nor economically feasible.

Guidelines:

- The answer NA means that the paper does not include experiments.
- The authors should answer "Yes" if the results are accompanied by error bars, confidence intervals, or statistical significance tests, at least for the experiments that support the main claims of the paper.

- The factors of variability that the error bars are capturing should be clearly stated (for example, train/test split, initialization, random drawing of some parameter, or overall run with given experimental conditions).
- The method for calculating the error bars should be explained (closed form formula, call to a library function, bootstrap, etc.)
- The assumptions made should be given (e.g., Normally distributed errors).
- It should be clear whether the error bar is the standard deviation or the standard error of the mean.
- It is OK to report 1-sigma error bars, but one should state it. The authors should preferably report a 2-sigma error bar than state that they have a 96% CI, if the hypothesis of Normality of errors is not verified.
- For asymmetric distributions, the authors should be careful not to show in tables or figures symmetric error bars that would yield results that are out of range (e.g. negative error rates).
- If error bars are reported in tables or plots, The authors should explain in the text how they were calculated and reference the corresponding figures or tables in the text.

## 8. Experiments compute resources

Question: For each experiment, does the paper provide sufficient information on the computer resources (type of compute workers, memory, time of execution) needed to reproduce the experiments?

Answer: [Yes] .

Justification: We include the experimental details in the appendix.

Guidelines:

- The answer NA means that the paper does not include experiments.
- The paper should indicate the type of compute workers CPU or GPU, internal cluster, or cloud provider, including relevant memory and storage.
- The paper should provide the amount of compute required for each of the individual experimental runs as well as estimate the total compute.
- The paper should disclose whether the full research project required more compute than the experiments reported in the paper (e.g., preliminary or failed experiments that didn't make it into the paper).

## 9. Code of ethics

Question: Does the research conducted in the paper conform, in every respect, with the NeurIPS Code of Ethics <https://neurips.cc/public/EthicsGuidelines?>

Answer: [Yes] .

Justification: No human objectives are involved in our research. Our dataset is created on the top of a fully open source dataset with Apache License 2.0.

Guidelines:

- The answer NA means that the authors have not reviewed the NeurIPS Code of Ethics.
- If the authors answer No, they should explain the special circumstances that require a deviation from the Code of Ethics.
- The authors should make sure to preserve anonymity (e.g., if there is a special consideration due to laws or regulations in their jurisdiction).

## 10. Broader impacts

Question: Does the paper discuss both potential positive societal impacts and negative societal impacts of the work performed?

Answer: [NA] .

Justification: This work focuses on evaluating embodied agent performance in simulated environments, with accuracy measured against predefined, human-authored criteria. As such, the study does not directly engage with real-world deployment or societal impact, making a discussion of positive or negative societal effects not applicable in this context.

Guidelines:

- The answer NA means that there is no societal impact of the work performed.
- If the authors answer NA or No, they should explain why their work has no societal impact or why the paper does not address societal impact.
- Examples of negative societal impacts include potential malicious or unintended uses (e.g., disinformation, generating fake profiles, surveillance), fairness considerations (e.g., deployment of technologies that could make decisions that unfairly impact specific groups), privacy considerations, and security considerations.
- The conference expects that many papers will be foundational research and not tied to particular applications, let alone deployments. However, if there is a direct path to any negative applications, the authors should point it out. For example, it is legitimate to point out that an improvement in the quality of generative models could be used to generate deepfakes for disinformation. On the other hand, it is not needed to point out that a generic algorithm for optimizing neural networks could enable people to train models that generate Deepfakes faster.
- The authors should consider possible harms that could arise when the technology is being used as intended and functioning correctly, harms that could arise when the technology is being used as intended but gives incorrect results, and harms following from (intentional or unintentional) misuse of the technology.
- If there are negative societal impacts, the authors could also discuss possible mitigation strategies (e.g., gated release of models, providing defenses in addition to attacks, mechanisms for monitoring misuse, mechanisms to monitor how a system learns from feedback over time, improving the efficiency and accessibility of ML).

## 11. Safeguards

Question: Does the paper describe safeguards that have been put in place for responsible release of data or models that have a high risk for misuse (e.g., pretrained language models, image generators, or scraped datasets)?

Answer: [NA] .

Justification: Our paper poses no such risks.

Guidelines:

- The answer NA means that the paper poses no such risks.
- Released models that have a high risk for misuse or dual-use should be released with necessary safeguards to allow for controlled use of the model, for example by requiring that users adhere to usage guidelines or restrictions to access the model or implementing safety filters.
- Datasets that have been scraped from the Internet could pose safety risks. The authors should describe how they avoided releasing unsafe images.
- We recognize that providing effective safeguards is challenging, and many papers do not require this, but we encourage authors to take this into account and make a best faith effort.

## 12. Licenses for existing assets

Question: Are the creators or original owners of assets (e.g., code, data, models), used in the paper, properly credited and are the license and terms of use explicitly mentioned and properly respected?

Answer: [Yes] .

Justification: The LLaVA-Video-178K dataset is under Apache 2.0 license.

Guidelines:

- The answer NA means that the paper does not use existing assets.
- The authors should cite the original paper that produced the code package or dataset.
- The authors should state which version of the asset is used and, if possible, include a URL.
- The name of the license (e.g., CC-BY 4.0) should be included for each asset.

- For scraped data from a particular source (e.g., website), the copyright and terms of service of that source should be provided.
- If assets are released, the license, copyright information, and terms of use in the package should be provided. For popular datasets, [paperswithcode.com/datasets](https://paperswithcode.com/datasets) has curated licenses for some datasets. Their licensing guide can help determine the license of a dataset.
- For existing datasets that are re-packaged, both the original license and the license of the derived asset (if it has changed) should be provided.
- If this information is not available online, the authors are encouraged to reach out to the asset's creators.

### 13. New assets

Question: Are new assets introduced in the paper well documented and is the documentation provided alongside the assets?

Answer: [Yes] .

Justification: we provide the whole repository that generates our dataset.

Guidelines:

- The answer NA means that the paper does not release new assets.
- Researchers should communicate the details of the dataset/code/model as part of their submissions via structured templates. This includes details about training, license, limitations, etc.
- The paper should discuss whether and how consent was obtained from people whose asset is used.
- At submission time, remember to anonymize your assets (if applicable). You can either create an anonymized URL or include an anonymized zip file.

### 14. Crowdsourcing and research with human subjects

Question: For crowdsourcing experiments and research with human subjects, does the paper include the full text of instructions given to participants and screenshots, if applicable, as well as details about compensation (if any)?

Answer: [NA] .

Justification: the paper does not involve crowdsourcing nor research with human subjects.

Guidelines:

- The answer NA means that the paper does not involve crowdsourcing nor research with human subjects.
- Including this information in the supplemental material is fine, but if the main contribution of the paper involves human subjects, then as much detail as possible should be included in the main paper.
- According to the NeurIPS Code of Ethics, workers involved in data collection, curation, or other labor should be paid at least the minimum wage in the country of the data collector.

### 15. Institutional review board (IRB) approvals or equivalent for research with human subjects

Question: Does the paper describe potential risks incurred by study participants, whether such risks were disclosed to the subjects, and whether Institutional Review Board (IRB) approvals (or an equivalent approval/review based on the requirements of your country or institution) were obtained?

Answer: [NA] .

Justification: the paper does not involve crowdsourcing nor research with human subjects.

Guidelines:

- The answer NA means that the paper does not involve crowdsourcing nor research with human subjects.

- 911
- 912
- 913
- 914
- 915
- 916
- 917
- 918
- Depending on the country in which research is conducted, IRB approval (or equivalent) may be required for any human subjects research. If you obtained IRB approval, you should clearly state this in the paper.
  - We recognize that the procedures for this may vary significantly between institutions and locations, and we expect authors to adhere to the NeurIPS Code of Ethics and the guidelines for their institution.
  - For initial submissions, do not include any information that would break anonymity (if applicable), such as the institution conducting the review.

919 **16. Declaration of LLM usage**

920 Question: Does the paper describe the usage of LLMs if it is an important, original, or  
921 non-standard component of the core methods in this research? Note that if the LLM is used  
922 only for writing, editing, or formatting purposes and does not impact the core methodology,  
923 scientific rigorousness, or originality of the research, declaration is not required.

924 Answer: [Yes] .

925 Justification: ESCA is a new method augmenting MLLMs with scene graphs.

926 Guidelines:

- 927
- 928
- 929
- 930
- The answer NA means that the core method development in this research does not involve LLMs as any important, original, or non-standard components.
  - Please refer to our LLM policy (<https://neurips.cc/Conferences/2025/LLM>) for what should or should not be described.

---

**Algorithm 1: Video Mask Propagation with New Object Discovery**

---

**Input:** Video  $V = \{I_0, \dots, I_T\}$ , mask generator  $\mathcal{G}$ , propagation model  $\mathcal{P}$ , state  $S$   
**Input:** Batch size  $B$ , thresholds:  $\tau_{\text{iou}}, \tau_{\text{score}}, \tau_{\text{inner}}$ , stride  $s$   
**Output:** Mask dictionary `video_segments`: Dict[Frame][ObjectID] = Mask

```
1 video_segments  $\leftarrow \emptyset$ , now_frame  $\leftarrow 0$ ;  
2 while not saturated do  
3    $I \leftarrow V[\text{now\_frame}]$ ; // Load current image frame  
4    $\mathcal{M} \leftarrow \mathcal{G}(I)$ ; // Generate masks for current frame  
   // Find new object masks not yet propagated from this frame  
5    $\mathcal{M}_{\text{new}} = \text{filter}(\mathcal{M}, \text{video\_segments}[\text{now\_frame}], \tau_{\text{iou}}, \tau_{\text{score}}, \tau_{\text{inner}})$ ;  
   // Register the new masks as prompts  
6    $\mathcal{P}_{\text{buf}}.\text{update}(\mathcal{M}_{\text{new}})$ ;  
   // Prompt the mask generator with updated masks as initialize condition  
7    $\mathcal{P}.\text{reset\_state}(S)$ ;  
8   foreach ( $oid, frame\_id, mask$ ) in  $\mathcal{P}_{\text{buf}}$  do  
9      $\mathcal{P}.\text{add\_new\_mask\_prompt}(S, frame\_id, o, m)$ ;  
10  end  
   // Propagate the mask prompts through the whole video  
11  foreach ( $f, \{o_i\}, \{\ell_i\}$ )  $\in \mathcal{P}.\text{propagate}(S)$  do  
12    if  $f \notin \text{video\_segments}$  then  
13       $\text{video\_segments}[f] \leftarrow \{\}$ ;  
14    end  
15    foreach  $i$  do  
16       $m_i \leftarrow \text{binarize}(\ell_i)$ ;  
17       $\text{video\_segments}[I_f][o_i] \leftarrow m_i$ ;  
18    end  
19  end  
   // Find the next frame to process with least mask coverage  
20  Compute coverage  $\rho_f$  over  $f \in \{\text{now\_frame} + 1, \dots, T\}$ ;  
21  saturated, now_frame = check_saturation( $\rho$ )  
22 end  
23 return video_segments
```

---

## A ESCA-Video-87K

### A.1 Video and Caption Source

We build upon the LLaVA-Video-178K dataset [89], which comprises diverse video sources and GPT-generated, detailed video descriptions.

ESCA-Video-87K contains a total of 87,045 datapoints, each consisting of a video clip ranging from 0 to 30 seconds in length, along with its corresponding caption. The videos are drawn from ten primary sources, spanning a wide range of content—including egocentric and household activities, as well as crowd-sourced videos from YouTube. Specifically, these ten sources are HD-VILA-100M [80], InternVid-10M [74], VidOR [64], VIDAL (YouTube Shorts) [94], YouCook2 [93], Charades [69], ActivityNet [10], Kinetics-700 [38], Something-Something v2 [23], and Ego4d [24]. The captions were generated using GPT-4 with a dense frame sampling technique [89].

The two main contributions of ESCA-Video-87K are the inclusion of object trajectories and executable programmatic specifications. We leverage SAM2 [62] to generate object trajectories and design a custom algorithm to handle objects that do not appear in the first frame. To obtain the specifications, we use GPT-4 and develop a transcompiler that converts them into executable programs.

These two additional components enable fine-grained spatio-temporal alignment between the video content and the concepts expressed in the specifications [31]. Notably, the only source of supervision is the video itself; all other annotations are derived using multimodal large language models (MLLMs). We refer to this approach as *model-driven self-supervision*.

---

**Algorithm 2: Bounding Box Prompt Buffer Class**

---

**Output:** Prompt dictionary for propagation; object-to-class mapping

```
1 Initialize fields: oid, frame2bboxes, frame2masks, valid_prompts,
  overlapped_prompts;
  // Add predicted bounding box and mask
2 Function AddPrompt(frame_id, box, mask,)
3   if not valid(m) then
4     return
5   end
6   frame2bboxes[frame_id].append(box); frame2masks[frame_id].append(mask)
7 end
8 Function PopMostDensePromptFrame()
  // Find frame f* with largest mask area
9    $f^* \leftarrow \arg \max_f \sum \text{frame2masks}[f]$ ;
  // Assign object IDs starting from oid for each bbox in f*
10  foreach box in frame2bboxes[f*] do
11    valid_prompts[f*][oid]  $\leftarrow$  box; oid += 1;
12  end
  // Remove prompts from to process list
13  frame2bboxes.pop(f*); frame2masks.pop(f*);
14  return f*, valid_prompts[f*]
15 end
16 Function RemoveDuplicatePrompts(video_segments)
17  foreach frame_id in video_segments do
18    if frame_id not in frame2masks then
19      continue
20    end
21    Compute IoU between predicted and prompt masks in frame_id;
  // Filter prompts already covered
22    Remove overlapping segments from frame2bboxes and frame2masks
23  end
24 end
```

---

## A.2 Object Trajectory Generation

We aim to generate object trajectories from videos using Segment Anything 2 (SAM2). A key challenge is discovering new objects that do not appear in the first frame, which is not natively supported by SAM2. To address this, we design an iterative algorithm that identifies the next frame most likely to contain a new object and propagates its mask throughout the video, as illustrated in Algorithm 1. To further leverage concepts generated by GPT-4, we extend this algorithm to incorporate arbitrary frame-based bounding box generators, such as Grounding DINO [51] and YOLO [26]. This extended version uses a prompt scheduler that prioritizes frames containing the highest number of grounded objects and iteratively propagates them across the video, as shown in Algorithm 2 and Algorithm 3.

---

**Algorithm 3: Mask Generation via Frame-wise Bounding Box Grounding**

---

**Input:** Grounding model  $\mathcal{G}$ , SAM predictor  $\mathcal{P}$ , SAM mask generator  $\mathcal{M}$ , video frames  $\{I_0, \dots, I_T\}$ , label set  $\mathcal{C}$   
**Input:** Box and text thresholds  $\tau_b, \tau_t$ , target FPS, max propagation steps  $k$   
**Output:** Per-frame mask segments `video_segments`, object-to-class mapping `oid_pred`

```
1 Initialize prompt_memory  $\leftarrow$  PromptBuffer();  
  // Step 1: Grounding-based object detection  
2 foreach frame  $I_f$  in video do  
3   bboxes =  $\mathcal{G}(I_f, \mathcal{C})$ ;  
4   video_boxes[f]  $\leftarrow$  bboxes;  
5 end  
  // Step 2: Generate masks for all bounding boxes  
6 foreach ( $f, \text{bboxes}$ )  $\in$  video_boxes do  
7   masks =  $\mathcal{M}(I_f, \text{bboxes})$ ;  
8   foreach ( $\text{box}, \text{mask}$ ) in zip(bboxes, masks) do  
9     prompt_memory.add_prompt( $f, \text{box}, \text{mask}$ )  
10  end  
11 end  
  // Step 3: Iterative propagation from dense prompt frame  
12  $f_{\text{start}}, \text{prompt} \leftarrow$  prompt_memory.pop_most_dense_fid_prompt();  
13 video_segments  $\leftarrow \emptyset, t \leftarrow 0$ ;  
14 while prompt  $\neq \emptyset$  and  $f_{\text{start}} \neq -1$  and  $t < k$  do  
15   Reset predictor state  $S \leftarrow S_0$ ;  
16   foreach ( $f, \text{frame\_prompt}$ )  $\in$  prompt_memory.valid_prompts do  
17     foreach ( $o, b$ )  $\in$  frame_prompt do  
18       Add prompt ( $o, b$ ) at frame  $f$  into  $\mathcal{P}$  with state  $S$ ;  
19     end  
20   end  
  // Propagate forward  
21   foreach ( $f, \{o_i\}, \{\ell_i\}$ )  $\in \mathcal{P}.propagate(S)$  do  
22     video_segments[f]  $\leftarrow$  binarized masks  $\{\ell_i > 0\}$  mapped to  $o_i$   
23   end  
  // Propagate backward  
24   foreach ( $f, \{o_i\}, \{\ell_i\}$ )  $\in \mathcal{P}.propagate(S, \text{reverse} = \text{True})$  do  
25     video_segments[f]  $\leftarrow$  binarized masks  $\{\ell_i > 0\}$  mapped to  $o_i$   
26   end  
27   prompt_memory.remove_dup_prompt(video_segments);  
28    $f_{\text{start}}, \text{prompt} \leftarrow$  prompt_memory.pop_most_dense_fid_prompt();  
29    $t \leftarrow t + 1$ ;  
30 end  
31 return video_segments
```

---

### 960 A.3 Concept Generation

961 To construct low-level supervision from high-level captions, we leverage GPT-4 to generate spatio-  
962 temporal specifications. To mitigate potential hallucinations from the language model, we design a  
963 compiler that verifies the validity of the generated programs. We use a few-shot prompt with three  
964 examples.

#### 965 Prompt 1: Role Definition

```
966 You are a super user in logic programming.  
967 You are also an expert at structured data extraction.  
968  
969
```

---

#### 970 Prompt 2: General Task Instruction

```
971 You will describe the event length and location in  
972 both natural language and fraction of the video.  
973
```

974 The natural language description of the locations in the video  
 975 can be: early, mid, late.  
 976 The natural language description of the durations of the event  
 977 can be: long, medium, short  
 978 Examples of precise video locations: [1/4, 1/2], [2/3, 1].  
 979 Examples of event durations: 1/4, 2/3, 1.

---

### 981 Prompt 3: Few-shot Examples

Listing 1: "One of the few-shot example for concept extraction"

Caption: A man carries a child and walks to the left from  
 behind a woman holding another child.  
 Video\_ID: "0be30efe",  
 Action json:  
 {"video\_id": "0be30efe",  
 "sequential descriptions": [ "man A carry child B, women C  
 hold child D, man A is behind women C", "man A walk", "man  
 A at left" ],  
 "time stamps":  
 { "1": { "description": [ "man A carry child B", "women C  
 hold child D", "man A is behind women C" ], "  
 982 programmatic": [ "carrying(A, B)", "name(A, man)", "  
 name(B, child)", "holding(C, D)", "name(C, women)", "  
 name(D, man)", "behind(A, C)", ], "duration": "short",  
 "duration precise": "1/4", "video location": "early",  
 "video location precise": "[0, 1/4]" }, "2": { "  
 description": [ "man A walk" ], "programmatic": [ "walk  
 (A)", ], "duration": "medium", "duration precise": "1/2"  
 ", "video location": "mid", "video location precise":  
 "[1/4, 3/4]" }, "3": { "description": [ "man A at left"  
 ], "programmatic": [ "left(A)" ], "duration": "short",  
 "duration precise": "1/4", "video location": "late", "  
 video location precise": "[3/4, 1]"}}

---

### 983 Prompt 4: Concept Definition

984 Note all the relations are name, unary or binary.  
 985 A name relation takes in two arguments, the first is always a  
 986 variable, and the second argument could be noun ("apple"),  
 987 noun phrase ("ancient\_building"), location("dark\_forest"),  
 988 etc. For example "name(A, "apple")" means the variable A  
 989 refers to an apple. Please ensure no space occur in the  
 990 second argument.  
 991 A unary relation takes in one variable as its argument. For  
 992 example, close(A) means A is close to the camera.  
 993 A binary relation takes in two variables as its arguments. For  
 994 example, above(A, B) means A is above B.  
 995 The entity in the binary and unary relation are variables in  
 996 the form of capitalized letters (A, B).  
 997 The predicate of the unary relation can be adjectives, verbs,  
 998 and name.  
 999 The predicate of the binary relation can be preposition, and  
 1000 verb.  
 1001 Please include the name relation any time if applicable.  
 1002 Please make the preposition and adjectives into separate two  
 1003 relation.  
 1004

1005 For each time stamp, please only describe the events that are  
1006 happening at the same time, if any sequential events occur,  
1007 put them into multiple time stamps.  
1008 For example, instead of 'person A enter from left, person A  
1009 walk to center, person A move to couch' in one time stamp,  
1010 put it into three different time stamps: "person A enter from  
1011 left", "person A walk to center", "person A move to couch".  
1012 Please only describe one single event in sequential description  
1013 per time stamp.  
1014 Please use as many relations as possible to precisely describe  
1015 the action.  
1016 Please generate the action json programs for the following  
1017 captions in the following format:  
1018 {"actions": {caption\_id: action json programs}}  
1019 IMPORTANT: Please REMOVE all new line characters and extra  
1020 spaces in the generated json!

---

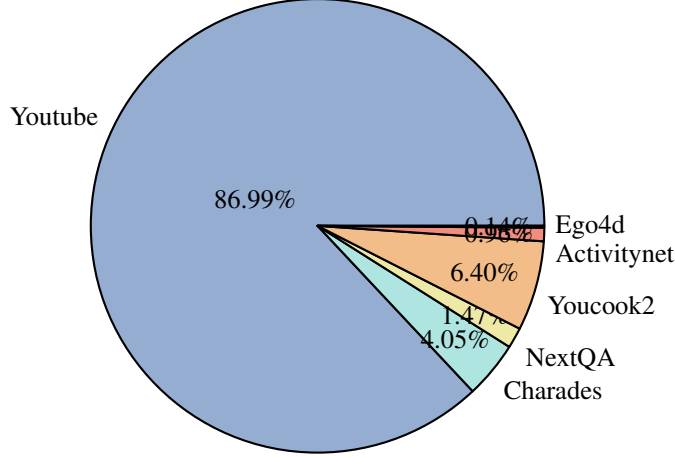

Figure 11: Video sources for ESCA-Video-87K.

#### 1022 A.4 Dataset Statistics

1023 We present the statistics of ESCA-Video-87K through three perspectives: the composition of video  
 1024 sources, the complexity of extracted specifications, and the word clouds of associated concepts. We  
 1025 selected 0–30 second clips from the LLAVA-VIDEO-178K dataset [CITO](#), with the resulting source  
 1026 distribution shown in Figure [11](#). Our extracted spatio-temporal specifications exhibit considerable  
 1027 complexity. As illustrated in Figure [12](#), a single specification can contain multiple names, actions,  
 1028 relations, and events. In addition, we visualize the vocabulary diversity using word clouds for names,  
 1029 actions, and relations. In total, our dataset includes 220,905 unique names, 57,930 unique actions,  
 1030 and 35,415 unique relation keywords.

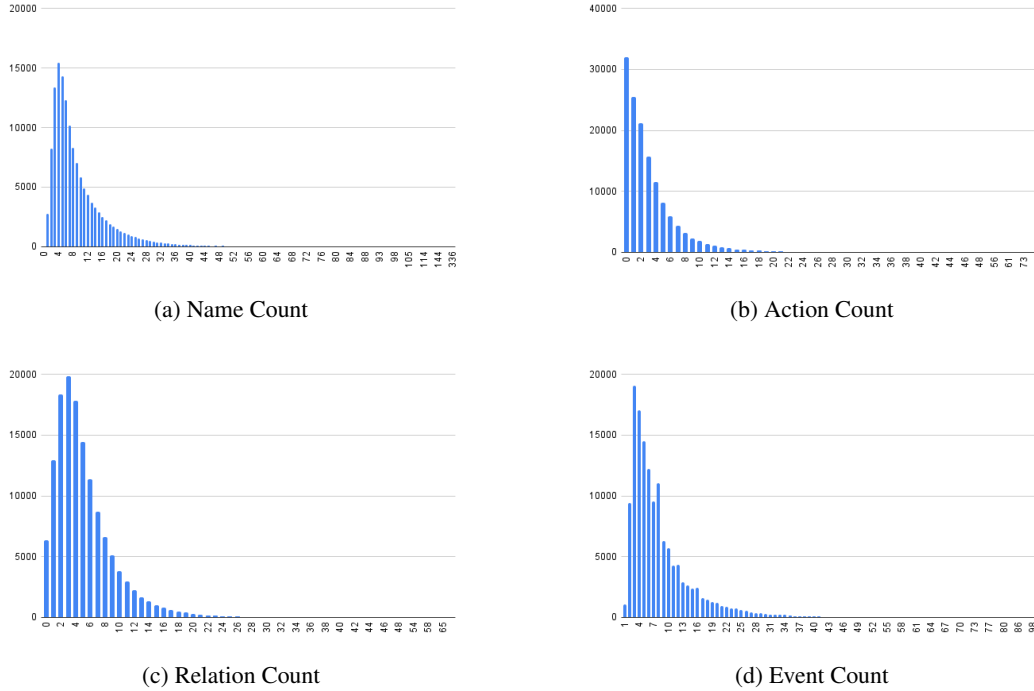

Figure 12: Distribution of Names, Attributes, Relations, and Events

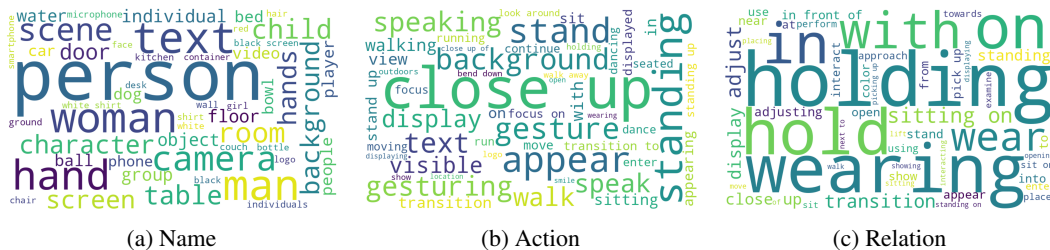

Figure 13: Word cloud visualizations of the top-50 most frequent names, attributes, and relations.

## B SGClip Training Details

We build our training pipeline following the LASER work [31], which uses a weakly-supervised approach to align video with its caption. Note that the caption used in SGClip is also generated from the video with multi-modal large language model (GPT-4o), and this leads to all labels are generated from the video itself, thus, we consider this approach as a model-driven self-supervised method. In this section, we elaborate on the details of how SGClip is trained and providing details in the training procedure.

### B.1 Compute

All our experiments are carried out on a device with (1) 128 32-core Intel(R) Xeon(R) Gold 6338 CPU @ 2.00GHz (2) 10 NVIDIA H100 PCIe GPUs. SGClip takes 10 days to finetune on the 87K datapoints for 3 epochs.

### B.2 Loss

We train the SGClip with three different losses: contrastive loss, temporal loss, and semantic loss.

**Contrastive Loss.** To help SGClip distinguish between concepts that appear in a video and those that do not, we adopt a contrastive loss design. For each video  $V$ , we pair it with its corresponding specification  $\phi$  and randomly sample an unrelated specification  $\phi'$  from the dataset. The objective is to maximize the alignment score between the matching pair  $(V, \phi)$  toward 1, while minimizing the score between the mismatched pair  $(V, \phi')$  toward 0.

A key challenge arises from the fact that specifications are exceptionally long—each containing an average of 8.24 events per datapoint—making it computationally expensive to ground the entire specification in the video. To address this, we introduce a chunked event training strategy. Each specification is divided into smaller chunks containing at most 3 events, and we align each chunk with the full video. When sampling mismatched pairs, we similarly draw from these smaller chunks to maintain alignment granularity and training efficiency.

**Temporal Loss.** To improve alignment accuracy between each event and its corresponding location in the video, we query GPT for a fine-grained estimation of the event’s temporal span. For all satisfiable event sequences, we assign higher rewards to those aligned with the desired temporal location, and reduced rewards to those outside the target range.

**Semantic Loss.** We further incorporate common-sense negations to improve the model’s understanding of what is unlikely to occur in a given scenario. For example, if a scene is outdoors, it is unlikely to contain a bed; if a person is “standing,” they are unlikely to be “sleeping” at the same time; if a person is “holding” an object, it is improbable that the object is “hitting” the person simultaneously.

To introduce this notion of negation, we first identify the top 5,000 most frequent keywords across names, actions, and relations. Using word vectors from SpaCy [28], we compute the 50 most semantically distant keywords within this subset for each current scenario. During training, we sample 5 keywords per category (name, action, relation) from these 50 distant terms to compute a semantic loss that penalizes implausible pairings.

### 1068 **B.3 Hyperparameters**

1069 We use a learning rate of  $1 \times 10^{-6}$  and a batch size of 2. The video is sampled at a target frame rate  
1070 of 1 FPS. For the semantic loss, we sample 5 negative keywords per instance and set the semantic  
1071 loss weight to 0.1. In the provenance setting for Scallop, we use difftopkproofs with a top- $k$  value of  
1072 3 for proof extraction. We fine tune from the CLIP model with a total of 3 epochs, and we evaluate  
1073 and ensemble on the best performing models from different epochs.

| Model                | Strategy | Subset |        |         |        |       | Avg          |
|----------------------|----------|--------|--------|---------|--------|-------|--------------|
|                      |          | Base   | Common | Complex | Visual | Long  |              |
| InternVL-2.5-38B-MPO | Base     | 55.00  | 60.00  | 51.67   | 40.00  | 30.00 | 47.33        |
|                      | + GD     | 60.00  | 61.67  | 56.67   | 48.33  | 11.66 | 47.67        |
|                      | + ESCA   | 58.33  | 61.67  | 53.33   | 58.33  | 26.66 | <b>51.66</b> |
| Gemini-2.0-flash     | Base     | 56.67  | 46.67  | 48.41   | 36.67  | 15.00 | 40.68        |
|                      | + GD     | 55.00  | 53.33  | 50.00   | 38.33  | 6.00  | 40.53        |
|                      | + ESCA   | 56.67  | 41.67  | 43.33   | 46.67  | 21.66 | <b>42.00</b> |
| Qwen2.5-VL-72B-Ins   | Base     | 58.34  | 48.30  | 48.30   | 36.70  | 33.33 | 44.99        |
|                      | + GD     | 65.00  | 55.00  | 58.00   | 43.33  | 20.00 | 48.27        |
|                      | + ESCA   | 60.00  | 48.33  | 60.00   | 46.67  | 31.67 | <b>49.33</b> |
| GPT-4o               | Base     | 55.00  | 60.00  | 58.33   | 60.00  | 23.33 | 51.33        |
|                      | + GD     | 63.33  | 63.33  | 65.00   | 53.33  | 21.66 | 53.33        |
|                      | + ESCA   | 66.67  | 62.00  | 63.33   | 55.00  | 26.67 | <b>54.67</b> |

Table 1: Detailed performance on EB-Navigation, decomposed by subsets of tasks.

## C Additional Experimental Results

### C.1 EmbodiedBench: Navigation

We demonstrate that ESCA enhances agent performance in navigating to target objects on embodied benchmarks, as shown in Table 1. Across four base multimodal large language models, ESCA consistently outperforms both the base models and variants using only Grounding-DINO. We outline the design of the transfer protocol and provide qualitative studies in the following section.

**Transfer Protocol: Grounding DINO** The overall pipeline of ESCA with Grounding DINO consists of three main steps: concept extraction, object identification, and visual summarization and validation. Rather than performing full scene graph prediction, we directly use Grounding DINO to extract candidate target objects based on their name and attributes. Each concept input to Grounding DINO follows the format `<attribute> <object name>`, such as "a grey rectangular object." The ESCA pipeline then passes the augmented image and the newly constructed query back to the MLLM to predict subsequent actions. Note that, based on our study, Grounding DINO tends to generate false positive candidate objects, which leads to a performance drop on the long-horizon subset. This is the only task subset where the target object is not visible in the initial scenario. The box threshold for grounding DINO is 0.2, and the text threshold is 0.1.

**Transfer Protocol: ESCA** The overall pipeline of ESCA with SGClip consists of four main steps: concept extraction, object identification, scene graph generation, and visual summarization and validation. We begin by using Grounding DINO to extract candidate target objects and their related objects based on object names. Next, SGClip predicts the attributes and relationships of the identified objects and aggregates predictions across names, attributes, and relationships. To ensure precision, we select only the top-1 object identified as the target and apply a confidence threshold of 0.3. For Grounding DINO, we use a box threshold of 0.1 and a text threshold of 0.1.

#### Qualitative Studies

We present two tasks to qualitatively analyze performance on the EB-Navigation environment. Each task is solved using three configurations: GPT-4o alone, GPT-4o augmented with Grounding DINO, and GPT-4o augmented with ESCA. Compared to GPT-4o alone, both Grounding DINO and ESCA provide additional information that aids task completion. However, ESCA results in significantly fewer false negatives than Grounding DINO, leading to improved performance on long-horizon tasks.

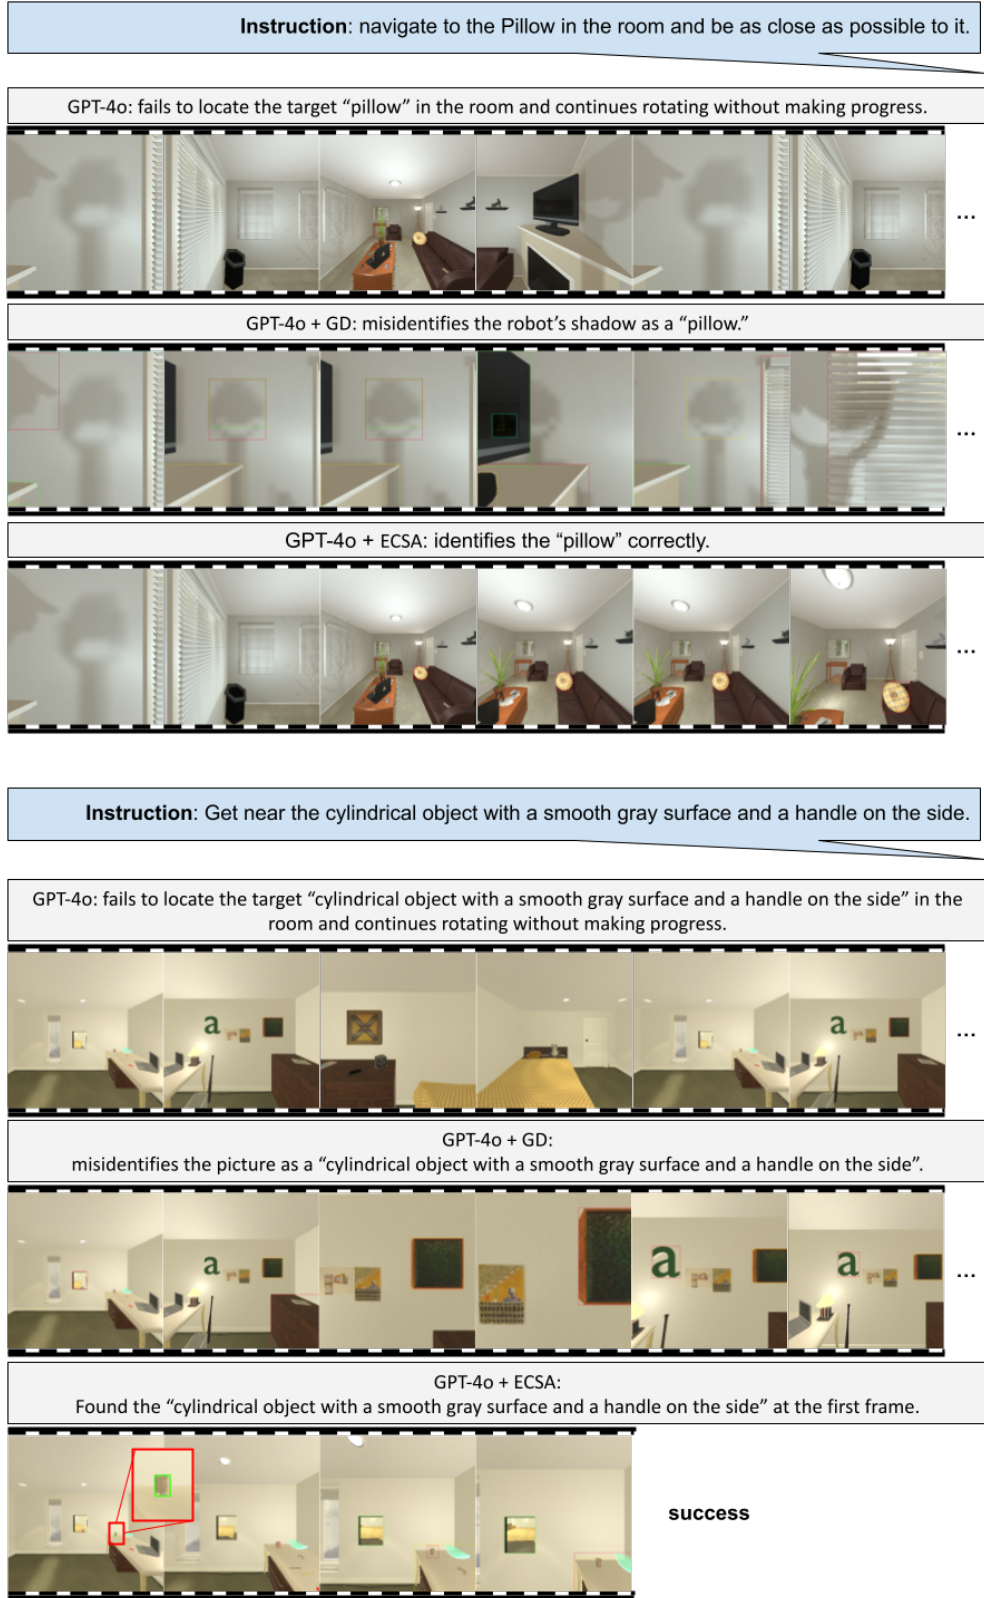

Figure 14: We present two qualitative examples comparing the original MLLM (GPT-4o), its variant augmented with Grounding DINO, and the full ESCA pipeline. Our observations show that ESCA improves the precision and quality of target object recognition.

| Model                | Strategy | Subset |        |         |        |         | Avg          |
|----------------------|----------|--------|--------|---------|--------|---------|--------------|
|                      |          | Base   | Common | Complex | Visual | Spatial |              |
| InternVL-2.5-38B-MPO | Base     | 10.42  | 25.00  | 20.83   | 27.78  | 12.50   | 19.31        |
|                      | + YOLO   | 14.58  | 14.58  | 25.00   | 19.40  | 22.92   | 19.30        |
|                      | + ESCA   | 31.25  | 21.00  | 14.58   | 27.78  | 27.08   | <b>24.30</b> |
| Gemini-2.0-flash     | Base     | 10.42  | 10.42  | 8.33    | 11.11  | 18.75   | 11.81        |
|                      | + YOLO   | 14.60  | 8.30   | 14.60   | 13.90  | 31.30   | 16.54        |
|                      | + ESCA   | 18.75  | 21.00  | 20.80   | 22.22  | 27.08   | <b>21.94</b> |
| Qwen2.5-VL-72B-Ins   | Base     | 2.08   | 6.25   | 8.33    | 4.16   | 2.78    | 4.72         |
|                      | + YOLO   | 18.80  | 20.80  | 4.20    | 8.30   | 14.60   | 13.34        |
|                      | + ESCA   | 18.80  | 10.41  | 16.67   | 16.67  | 10.42   | <b>14.59</b> |
| GPT-4o               | Base     | 16.67  | 25.00  | 20.83   | 35.41  | 19.44   | 23.47        |
|                      | + YOLO   | 39.60  | 29.20  | 29.20   | 19.40  | 25.00   | 28.48        |
|                      | + ESCA   | 33.33  | 31.25  | 37.50   | 38.89  | 31.25   | <b>34.44</b> |

Table 2: Detailed performance on EB-Manipulation, decomposed by subsets of tasks.

## C.2 EmbodiedBench: Manipulation

EB-Manipulation evaluates an agent’s ability to perform fine-grained object manipulation using visual input and language instructions. Unlike typical embodied AI settings, it provides full 3D spatial information (X, Y, Z coordinates) for all objects, removing the need for spatial inference and shifting the focus to semantic grounding and planning.

To construct structured object representations, we use the provided coordinates to generate point-based prompts for SAM 2.1, which produces segmentation masks that are converted into bounding boxes. Each object is annotated with a unique integer label starting from 1. we then prompt a vision-language model (VLM) to generate textual descriptions in the form <color> <object> (e.g., “yellow star”), using handcrafted templates to ensure consistency and match the number of detected objects.

Since the VLM outputs are unordered, we use ESCA, which treats predicted entities as categorical labels and outputs probability distributions over them for each bounding box. To resolve the correspondence between entities and boxes, we apply an entropy-based matching algorithm (Figure 3), which iteratively assigns the most confident (lowest-entropy) pairings while enforcing uniqueness constraints. The resulting assignments are used to generate a structured natural language description (e.g., “Object 1 is a yellow star”), which is appended to the original prompt and passed to the VLM to support precise and context-aware manipulation planning.

**Qualitative Studies** We present two tasks to qualitatively analyze performance on the EB-Manipulation environment. Each task is solved using three configurations: GPT-4o alone, GPT-4o augmented with YOLO, and GPT-4o augmented with ESCA. Compared to GPT-4o alone, both YOLO and ESCA provide additional information that aids task completion. However, ESCA results in more precise recognition than using YOLO alone.

**Error Analysis** As shown in Figure 17, we conducted an error analysis on the EB-Manipulation task. For each subtask category, we randomly sampled 10 erroneous tasks from both the GPT-4o baseline and GPT-4o augmented with ESCA. The results show that ESCA significantly reduces the perception error component.

<sup>2</sup>The three top-level error types are Perception, Reasoning, and Planning. The second-level errors are Hallucination, Wrong Recognition, Spatial Understanding, Spatial Reasoning, Reflection Error, Inaccurate Action, and Collision. For clarity, the figure uses these acronyms to label the different error types.

**Algorithm 4:** Entropy-Guided Assignment of Entity Names to Objects

Figure 15: Entropy-guided assignment algorithm that maps entity names to objects based on assignment scores and availability. At each step, it selects the object with the lowest entropy over valid assignments, then assigns the highest scoring available entity. This process continues until all objects are assigned.

Table 3: Maximum test **precision@k** and **recall@k** on the VidVRD dataset, evaluated every five epochs during 50 epochs of finetuning. Each cell shows the score followed by the epoch at which that score was achieved.

We further analyze the abilities of SGClip by applying it to the task of relation tagging of scene graphs. In this task, the ground truth bounding boxes of objects are provided, and the objective is to correctly classify their respective object class as well as the binary predicates between them. To demonstrate SGClip on this task, we use the VidVRD [65] dataset, comprised of 1,000 videos with 35 object categories and 132 predicate categories.

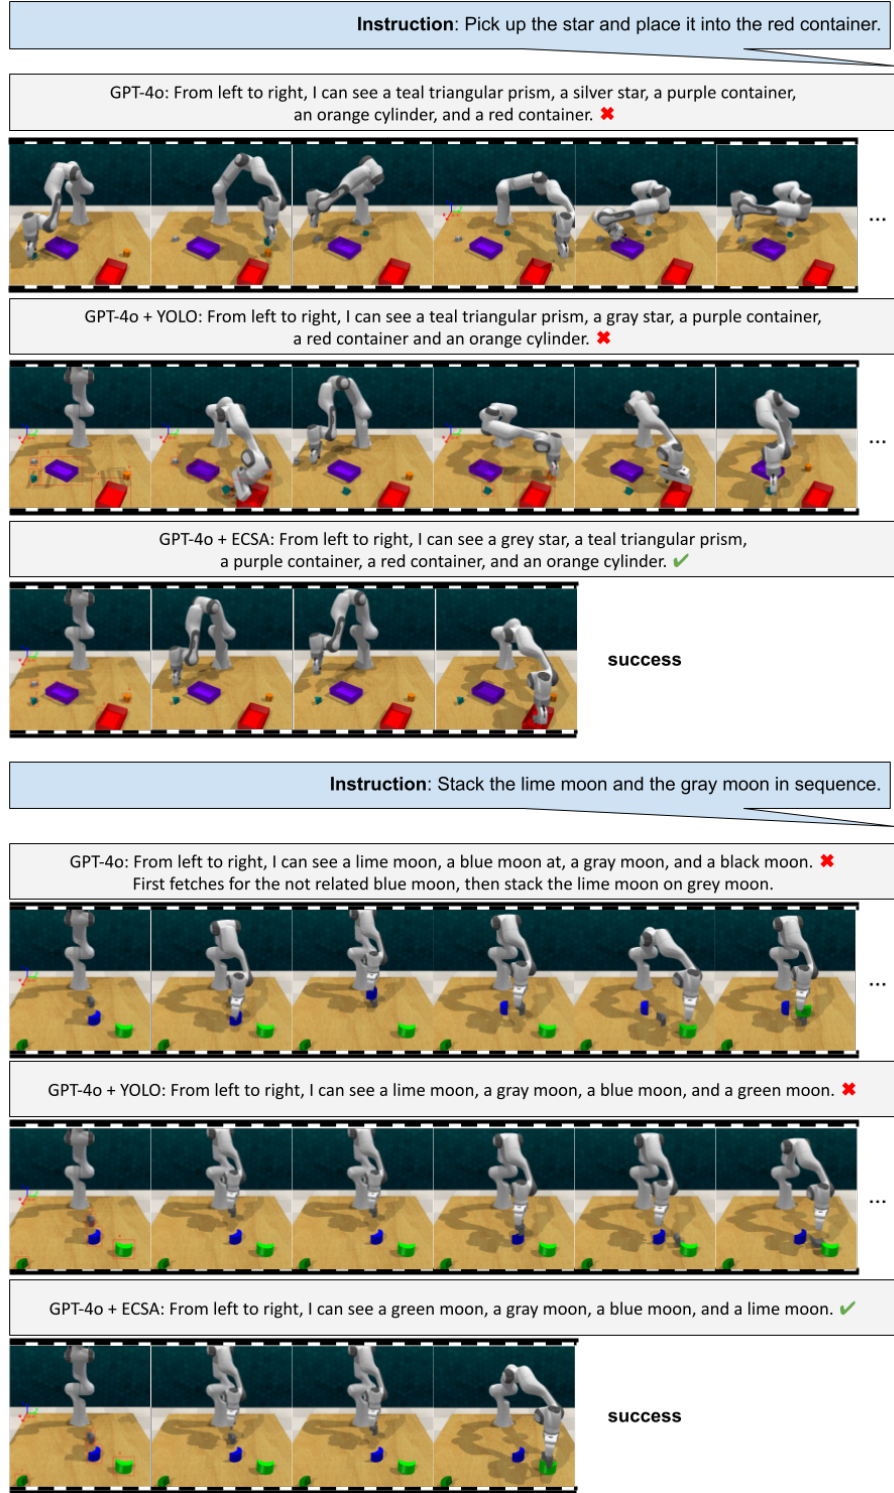

Figure 16: We present two qualitative examples comparing the original MLLM (GPT-4o), its variant augmented with YOLO, and the full ESCA pipeline. Our observations show that ESCA improves the precision and quality of scene graph recognition.

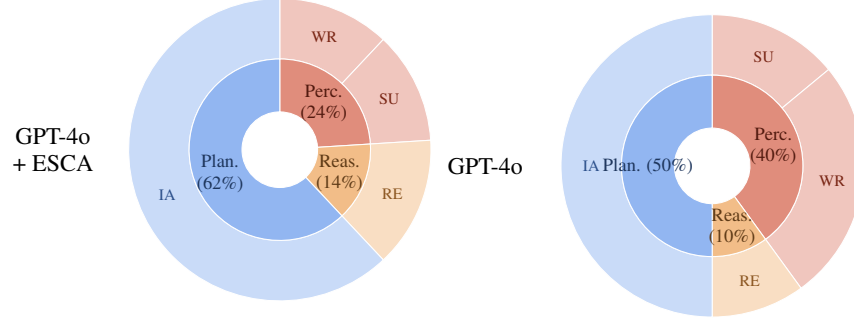

Figure 17: Error decomposition<sup>2</sup> of GPT-4o with and without ESCA, based on manual inspection of 50 EB-Manipulation tasks, with 10 randomly sampled from each subtasks. As we can see, ESCA has reduced perception error by a large margin.

| Category        | Model       | ActivityNet Accuracy (%) |
|-----------------|-------------|--------------------------|
| Zero-shot       | SGClip      | 76.34                    |
|                 | CLIP        | 74.37                    |
|                 | BIKE        | 80.00                    |
|                 | Text4vis    | 77.40                    |
|                 | ResT        | 26.30                    |
|                 | E2E         | 20.00                    |
| Few-shot (1%)   | SGClip      | 80.10                    |
|                 | CLIP        | 78.79                    |
| Few-shot (5%)   | SGClip      | 86.05                    |
|                 | CLIP        | 80.02                    |
| Fully finetuned | InternVL-6B | 95.90                    |

Table 4: ActivityNet accuracy for zero-shot, few-shot, and fully finetuned models. Zero-shot includes both external baselines and our models evaluated without training.

#### C.4 Down-stream Task: Action Recognition

To evaluate the generalization and finetunability of our model beyond structured scene graph understanding, we consider the task of action recognition, where each video is annotated with a single activity label. We use a combined version of ActivityNet 1.2 and 1.3, which together span 200 unique action classes and approximately 20,000 untrimmed videos across training, validation, and test splits. The action categories range from simple atomic activities such as swimming and rock climbing to more complex, composite tasks like starting a campfire or performing a basketball layup drill.

Similar to Embodied Bench, we adopt a transfer protocol tailored to the action recognition setting. For each second of the video, we generate the top-4 predicted actions along with their confidence scores. We then apply thresholding to discard low-confidence predictions, followed by temporal smoothing to aggregate results into a single continuous segment per video. The final action label is selected based on a weighted combination of its average confidence score and temporal frequency. The output is a single scored segment per video, defined by the merged temporal boundaries of the selected label.

The results, summarized in Table 3, demonstrate the strong fine-tuning capability of ESCA under varying supervision levels. ESCA consistently outperforms CLIP across 0%, 1%, and 5% training subsets, highlighting its superior ability to recognize fine-grained actions. Remarkably, ESCA achieves 92.0% accuracy using only 5% of the training data (approximately 800 videos), approaching the performance of InternVL-6B, which is trained on the full dataset. This indicates that ESCA generalizes effectively from limited supervision, whereas InternVL-6B’s advantage stems in part from its exposure to the entire training corpus.
